# Supplementary material for: Developing the developmental origins of health and disease (DOHaD) awareness scale to assess an education module for improving dietary behavior among college students
Source: PeerJ. 2024 Dec 19;12:e18669. doi: 10.7717/peerj.18669 (PMC11663402; doi:10.7717/peerj.18669)
Supplement: Supplemental Information 2 [file peerj-12-18669-s002.xlsx]

## Sheet: Sayfa1
							The scores obtained according to the sub-parameters of HEI-2015											pmdHEI
Plan	Energy (kcal)	Total Fruits	Total Fruits	Whole Fruits	Whole Fruits	Total Vegetables	Total Vegetables	Greens & Beans	Greens & Beans	Whole Grains	Whole Grains	Dairy	Dairy	Total Protein Foods	Total Protein Foods	Seafood & Plant Proteins	Seafood & Plant Proteins	Moderation	Refined Grains	Refined Grains	Sodium	Sodium	Added Sugars	Saturated Fats	sucrose	Total sucrose	Total Sugar( g)	Total Sugar
1	1266.46	0	0	0	0	365	288.205	13	10.2648	0	0	25	19.7401	165	130.284	0	0	1.46109	180	142.128	2.3137	1.8269	0	14.5184	4.28	0.09	0	4.37
2	1573.26	0	0	0	0	95	60.3842	0	0	0	0	278	176.703	61	38.773	0	0	0.881065	175	111.234	0.840687	0.53436	0	16.9788	77.39	0.15	0	77.54
3	3000.54	365	121.645	365	121.645	307	102.315	64	21.3295	0	0	206	68.6543	122	40.6593	0	0	2.2307	343	114.313	0.845738	0.281862	0	10.8517	14.97	4.58	0	19.55
4	2901.1	365	125.814	365	125.814	307	105.822	64	22.0606	0	0	206	71.0075	122	42.053	0	0	2.2307	343	118.231	0.845738	0.291523	0	10.8517	14.97	4.58	0	19.55
5	1267.09	0	0	0	0	159	125.484	13	10.2597	50	39.4605	180	142.058	58	45.7742	10	7.8921	1.98659	58	45.7742	0.994657	0.784993	0	14.2981	19.51	0.19	0	19.7
6	1210.24	0	0	0	0	164	135.51	0	0	0	0	160	132.205	130	107.417	0	0	2.03098	100	82.6282	2.07299	1.71287	4.32972	13.6832	16.53	0.1	13.1	29.73
7	2345.86	0	0	0	0	200	85.2566	31	13.2148	50	21.3141	300	127.885	111	47.3174	15	6.39424	1.58697	288	122.769	1.74785	0.745078	0	16.0137	23.79	0.01	0	23.8
8	1529.71	14	9.15206	14	9.15206	73	47.7215	0	0	0	0	510	333.397	150	98.0578	0	0	0.656207	168	109.825	1.79202	1.17148	0	17.2503	66.18	0.1	0	66.28
9	2180.12	578	265.123	578	265.123	250	114.673	0	0	0	0	244	111.92	100	45.869	0	0	1.80295	125	57.3363	0.999817	0.458606	0	11.4806	103.52	3.7	0	107.22
10	1877.94	295	157.087	295	157.087	404	215.129	0	0	0	0	274	145.905	140	74.5498	40	21.2999	2.78517	90	47.9249	1.22891	0.654393	0	11.3103	26.75	2.18	0	28.93
11	2369.73	0	0	0	0	151	63.7203	0	0	0	0	295	124.487	163	68.7842	40	16.8796	1.93658	221	93.2596	0.916628	0.386807	0	15.5106	81.71	0.22	0	81.93
12	2142.49	0	0	0	0	441	205.835	2	0.933493	0	0	500	233.373	140	65.3445	0	0	1.16923	160	74.6795	1.09636	0.51172	0	15.5889	62.69	0.32	0	63.01
13	2044	260	127.202	160	78.2779	0	0	0	0	0	0	95	46.4775	61	29.8434	0	0	1.65792	267	130.626	2.43238	1.19001	0	9.06164	60.76	1.33	0	62.09
14	2631.09	218	82.8554	218	82.8554	216	82.0953	15	5.70106	8	3.04056	117	44.4683	272	103.379	15	5.70106	1.80222	352	133.785	1.07322	0.407898	4.36017	11.4147	34.24	0.71	28.68	63.63
15	1012.68	0	0	0	0	384	379.192	30	29.6244	25	24.687	130	128.372	80	78.9983	30	29.6244	2.24282	50	49.3739	1.4269	1.40903	0	16.3971	10.22	0.11	0	10.33
16	1364.94	0	0	0	0	355	260.085	0	0	50	36.6316	230	168.506	40	29.3053	0	0	1.78465	50	36.6316	2.09647	1.53594	0	13.227	34.7	0.06	0	34.76
17	2538.66	0	0	0	0	406	159.927	10	3.93909	61	24.0284	200	78.7817	308	121.324	65	25.6041	3.74728	224	88.2355	1.03787	0.408825	0	7.50514	37.82	0.61	0	38.43
18	1825.96	0	0	0	0	50	27.3829	30	16.4297	0	0	255	139.653	180	98.5783	30	16.4297	1.55821	275	150.606	1.87597	1.02739	0	13.8453	18.3	0.22	0	18.52
19	1590.24	0	0	0	0	165	103.758	0	0	0	0	50	31.4418	174	109.417	0	0	1.92415	100	62.8836	2.38732	1.50123	0	13.73	45.47	0.27	0	45.74
20	2330.16	0	0	0	0	365	156.642	0	0	0	0	150	64.3733	171	73.3855	5	2.14578	2.50736	208	89.2643	0.487726	0.20931	0	6.82099	114.44	1.71	0	116.15
21	2801.63	78	27.8409	78	27.8409	80	28.5548	0	0	0	0	200	71.387	162	57.8235	0	0	1.06105	103	36.7643	1.20523	0.430189	0	18.3654	167.98	2.61	0	170.59
22	1868.86	0	0	0	0	180	96.3154	50	26.7543	0	0	206	110.228	95	50.8331	50	26.7543	1.47946	145	77.5874	1.51618	0.811287	0	17.4668	35.31	0	0	35.31
23	2777.76	0	0	0	0	386	138.961	65	23.4001	8	2.88002	272	97.9206	165	59.4004	65	23.4001	2.0745	290	104.401	1.39463	0.502072	0	12.8726	38.66	0.09	0	38.75
24	2069.08	0	0	0	0	166	80.2289	60	28.9984	0	0	52	25.1319	67	32.3815	7	3.38315	1.85689	297	143.542	1.15299	0.557246	5.54449	9.66517	63.14	0.69	28.68	92.51
25	1834.79	268	146.066	268	146.066	15	8.17532	50	27.2511	0	0	105	57.2273	203	110.639	70	38.1515	2.09087	158	86.1134	0.76775	0.41844	0	12.9546	42.77	0	0	42.77
26	1843.07	0	0	0	0	580	314.692	0	0	100	54.2573	240	130.218	60	32.5544	0	0	1.91588	80	43.4058	2.82654	1.53361	0	15.4405	43	0.34	0	43.34
27	1599.76	0	0	0	0	509	318.173	0	0	0	0	200	125.019	10	6.25094		0	1.57396	175	109.391	1.64397	1.02764	0	14.3009	43.05	0.32	0	43.37
28	2782.5	225	80.8625	225	80.8625	415	149.146	0	0	0	0	245	88.0503	135	48.5175	0	0	1.91993	291	104.582	1.38877	0.499108	0	12.2394	66.18	0.9	0	67.08
29	2496.09	0	0	0	0	75	30.047	0	0	0	0	224	89.7404	145	58.0909	25	10.0157	1.16478	200	80.1253	2.26019	0.905491	0	19.4741	65.85	0.58	0	66.43
30	2001.81	325	162.353	325	162.353	287	143.37	30	14.9864	100	49.9548	130	64.9412	70	34.9684	30	14.9864	2.26478	155	77.4299	0.794731	0.397006	0	8.74459	23.48	3.55	0	27.03
31	2342.98	0	0	0	0	315	134.444	180	76.8252	0	0	410	174.991	205	87.4954	100	42.6807	2.40845	178	75.9716	1.36195	0.581291	0	14.0974	7.43	0	0	7.43
32	1857.6	45	24.2248	45	24.2248	305	164.19	20	10.7666	0	0	230	123.816	75	40.3747	20	10.7666	2.37105	163	87.7476	1.10849	0.596735	0	11.8169	6.97	0.26	0	7.23
33	1634.13	0	0	0	0	132	80.7769	0	0	0	0	237	145.031	47	28.7615	0	0	1.82467	202	123.613	1.06947	0.654461	7.02025	13.3502	42.63	0	28.68	71.31
34	2523.95	0	0	0	0	200	79.2409	0	0	0	0	300	118.861	305	120.842	50	19.8102	2.91203	171	67.7509	0.821518	0.325489	0	10.3766	36.04	0.61	0	36.65
35	1600.28	0	0	0	0	73	45.617	0	0	0	0	205	128.103	100	62.4891	10	6.24891	1.90795	150	93.7336	1.43534	0.896928	0	14.3581	12.63	0.03	0	12.66
36	2036.14	0	0	0	0	10	4.91125	0	0	0	0	115	56.4794	60	29.4675	30	14.7338	0.975604	150	73.6688	0.800451	0.393122	0	19.5679	71.27	0	0	71.27
37	2113.56	125	59.1419	125	59.1419	421	199.19	60	28.3881	150	70.9703	110	52.0449	187	88.4763	60	28.3881	2.01119	163	77.1211	1.34325	0.635539	0	9.8961	23.17	0.48	0	23.65
38	2110.05	125	59.2403	125	59.2403	421	199.521	60	28.4353	150	71.0884	110	52.1315	187	88.6235	60	28.4353	2.01119	163	77.2494	1.34325	0.636596	0	9.8961	23.17	0.48	0	23.65
39	3554.85	702	197.477	702	197.477	314	88.33	0	0	0	0	450	126.588	215	60.4808	15	4.21959	1.36785	210	59.0742	1.57903	0.444189	0	18.5552	121.09	0.28	0	121.37
40	2562.07	90	35.1278	90	35.1278	177	69.0848	0	0	63	24.5895	104	40.5922	237	92.5033	40	15.6124	2.08017	187	72.9879	1.60352	0.625869	0	12.1367	42.34	0.16	0	42.5
41	2599.58	290	111.556	290	111.556	280	107.71	0	0	0	0	245	94.246	75	28.8508	0	0	2.10936	403	155.025	1.67158	0.643018	0	9.65579	46.17	1.06	0	47.23
42	1053.41	301	285.739	301	285.739	198	187.961	0	0	0	0	30	28.4789	50	47.4649	0	0	0.985237	75	71.1973	0.998472	0.947847	0	19.6761	24.22	0.36	0	24.58
43	1340.95	0	0	0	0	165	123.047	0	0	0	0	260	193.892	150	111.861	0	0	0.789152	165	123.047	1.97232	1.47084	0	17.5711	0.96	0	0	0.96
44	2443.84	15	6.13788	15	6.13788	183	74.8822	0	0	0	0	272	111.3	140	57.2869	0	0	1.46721	195	79.7925	1.28822	0.527131	0	15.276	75.08	0.92	0	76
45	3476.4	0	0	0	0	398	114.486	15	4.31481	71	20.4234	200	57.5308	298	85.7209	115	33.0802	3.3981	258	74.2147	0.712248	0.204881	0	9.28633	89.75	0.03	0	89.78
46	3857.81	96	24.8846	96	24.8846	705	182.746	0	0	50	12.9607	690	178.858	109	28.2544	5	1.29607	1.26639	173	44.8441	0.830549	0.21529	0	19.214	150.39	0.66	0	151.05
47	2311.43	205	88.6897	205	88.6897	242	104.697	0	0	0	0	50	21.6316	88	38.0717	20	8.65265	2.53945	300	129.79	0.792225	0.342742	0	8.49546	68.45	3.34	0	71.79
48	2309.47	205	88.765	205	88.765	242	104.786	0	0	0	0	50	21.65	88	38.104	20	8.66	2.53945	300	129.9	0.792225	0.343033	0	8.49546	0	0	0	0
49	2801.41	16	5.71141	16	5.71141	135	48.19	30	10.7089	0	0	346	123.509	310	110.659	80	28.557	1.99628	215	76.7471	0.78207	0.27917	0	15.5461	84.89	0.02	0	84.91
50	2798.35	16	5.71766	16	5.71766	135	48.2427	30	10.7206	0	0	346	123.644	310	110.78	80	28.5883	1.99628	215	76.831	0.78207	0.279476	0	15.5461	84.89	0.02	0	84.91
51	1031.41	0	0	0	0	0	0	0	0	0	0	120	116.346	50	48.4773	0	0	1.38125	86	83.381	1.83267	1.77685	0	19.3628	13.55	0	0	13.55
52	2030.38	0	0	0	0	452	222.618	0	0	0	0	300	147.756	121	59.5948	0	0	1.15727	145	71.4152	1.1722	0.577332	0	18.0099	68.14	0.23	0	68.37
53	1659.61	154	92.7929	154	92.7929	225	135.574	0	0	40	24.102	412	248.251	120	72.3061	80	48.2041	2.55072	50	30.1276	0.889908	0.536215	0	12.3481	10.37	0.38	0	10.75
54	1907.98	571	299.269	571	299.269	10	5.24115	10	5.24115	0	0	15	7.86172	128	67.0867	0	0	1.86637	70	36.688	1.08359	0.567926	0	10.7312	87.54	1.49	0	89.03
55	1291.96	0	0	0	0	137	106.04	0	0	0	0	200	154.804	98	75.8537	5	3.87009	1.74748	68	52.6332	0.563671	0.436291	0	10.3726	106.36	0	0	106.36
56	1625.49	0	0	0	0	131	80.5911	0	0	50	30.76	6	3.69119	65	39.9879	60	36.9119	2.89277	205	126.116	1.22737	0.755078	0	6.66076	45.88	0.69	0	46.57
57	1839.96	0	0	0	0	175	95.1108	160	86.9584	0	0	125	67.9363	128	69.5667	0	0	1.20881	256	139.133	1.75213	0.952263	0	17.1004	35.62	0.58	0	36.2
58	1521.51	20	13.1448	20	13.1448	723	475.186	0	0	40	26.2897	180	118.304	120	78.869	15	9.85863	2.22796	65	42.7207	1.04513	0.686901	0	14.8944	3.4	0.19	0	3.59
59	1936.92	0	0	0	0	210	108.42	0	0	0	0	166	85.7031	66	34.0747	5	2.58142	1.86441	145	74.8611	0.477996	0.246781	0.850835	10.6917	104.72	0.4	4.12	109.24
60	2473.21	0	0	0	0	275	111.192	0	0	20	8.08666	230	92.9966	75	30.325	0	0	1.24349	378	152.838	1.51115	0.611009	0	15.3784	53.81	0.05	0	53.86
61	1435.07	0	0	0	0	225	156.787	30	20.9049	0	0	200	139.366	70	48.7781	30	20.9049	1.39054	205	142.85	1.09471	0.762829	0	8.2219	45.37	0.13	0	45.5
62	1122.22	134	119.406	134	119.406	330	294.06	120	106.931	0	0	30	26.7327	125	111.386	35	31.1882	2.31349	82	73.0695	1.6241	1.44722	0	15.6306	14.03	0.32	0	14.35
63	4157.37	130	31.2698	130	31.2698	0	0	0	0	0	0	818	196.759	243	58.4504	110	26.459	2.28137	433	104.152	1.34249	0.322918	0	9.74823	166.38	3.3	0	169.68
64	3014.82	306	101.499	306	101.499	354	117.42	0	0	0	0	160	53.0712	72	23.882	0	0	1.04376	275	91.2161	0.711124	0.235876	0	20.3982	81.24	6.2	0	87.44
65	1563.4	40	25.5853	40	25.5853	270	172.701	0	0	0	0	370	236.664	100	63.9632	10	6.39632	1.21073	115	73.5576	1.36993	0.876251	0	11.8012	6.76	0.35	0	7.11
66	2715.86	0	0	0	0	253	93.1565	10	3.68207	25	9.20519	264	97.2068	175	64.4363	37	13.6237	2.83166	142	52.2855	0.660089	0.24305	0	12.2447	35.81	0.38	0	36.19
67	1264.89	225	177.881	225	177.881	395	312.28	30	23.7175	0	0	330	260.892	145	114.634	30	23.7175	1.3975	115	90.917	1.16763	0.923106	0	14.7855	8.25	0.77	0	9.02
68	997.16	0	0	0	0	387	388.102	0	0	0	0	25	25.0712	50	50.1424	0	0	2.11516	130	130.37	1.50691	1.5112	0	10.8939	28.63	0.67	0	29.3
69	2098.76	0	0	0	0	25	11.9118	30	14.2942	50	23.8236	440	209.648	230	109.589	50	23.8236	1.50574	105	50.0295	0.830571	0.395744	0	14.9488	56.23	0.07	0	56.3
70	2676.61	50	18.6803	50	18.6803	145	54.173	0	0	0	0	105	39.2287	234	87.424	15	5.6041	1.6586	344	128.521	1.40635	0.525423	0	13.6112	99.45	0.4	0	99.85
71	2726.92	225	82.5107	225	82.5107	456	167.222	210	77.01	100	36.6714	130	47.6728	190	69.6757	60	22.0028	1.95643	305	111.848	1.03939	0.381157	0	9.31711	29.15	0.75	0	29.9
72	2027.41	390	192.364	390	192.364	118	58.2023	0	0	0	0	200	98.648	150	73.986	0	0	0.677109	165	81.3846	0.814828	0.401906	0	14.3119	94.56	1.15	0	95.71
73	1793.19	0	0	0	0	309	172.319	0	0	0	0	80	44.6132	85	47.4016	0	0	1.6356	278	155.031	1.55831	0.869014	0	12.4923	23.54	0	0	23.54
74	1813.72	0	0	0	0	240	132.325	0	0	50	27.5677	0	0	0	0	0	0	2.03433	50	27.5677	1.59047	0.876908	0	11.418	85.45	0.68	0	86.13
75	1384.51	25	18.0569	25	18.0569	129	93.1738	0	0	0	0	15	10.8342	125	90.2846	10	7.22277	1.99743	108	78.0059	1.05521	0.762155	0	12.6565	78.75	1.14	0	79.89
76	1487.35	210	141.191	210	141.191	232	155.982	0	0	0	0	380	255.488	50	33.6168	0	0	1.42154	215	144.552	1.27759	0.858969	0	11.0673	20.69	0.78	0	21.47
77	2288.66	231	100.932	231	100.932	290	126.712	50	21.8468	75	32.7703	180	78.6486	192	83.8919	70	30.5856	2.57574	100	43.6937	1.09183	0.477061	0	12.1237	34.16	3.65	0	37.81
78	1447.56	130	89.8063	130	89.8063	0	0	0	0	0	0	120	82.8981	8	5.52654	0	0	1.32491	150	103.623	1.42936	0.987425	0	11.8068	44.34	0.59	0	44.93
79	2192.67	231	105.351	231	105.351	195	88.9327	0	0	0	0	200	91.213	150	68.4097	0	0	1.07365	165	75.2507	1.20538	0.549734	2.45728	13.5985	80.53	0.78	13.47	94.78
80	737.89	0	0	0	0	240	325.252	0	0	0	0	215	291.371	48	65.0503	0	0	1.75058	50	67.7608	1.92313	2.60626	8.11503	15.6487	1.11	0.18	14.97	16.26
81	1942.01	168	86.5083	168	86.5083	3	1.54479	0	0	40	20.5972	400	205.972	150	77.2396	25	12.8733	2.02405	195	100.411	0.901983	0.464458	2.69824	11.1781	29.41	0.81	13.1	43.32
82	1918.95	0	0	0	0	40	20.8447	50	26.0559	50	26.0559	283	147.476	298	155.293	64	33.3516	1.77078	44	22.9292	0.749196	0.39042	0	17.0437	29.95	0	0	29.95
83	2934.47	575	195.947	575	195.947	495	168.685	45	15.335	71	24.1952	430	146.534	105	35.7816	45	15.335	1.58864	97	33.0554	0.802993	0.273642	0	13.0102	137.23	1	0	138.23
84	2669.93	0	0	0	0	320	119.853	50	18.7271	0	0	42	15.7307	230	86.1446	70	26.2179	2.39592	290	108.617	0.886551	0.33205	3.12518	10.089	55.07	0.12	20.86	76.05
85	1924.56	0	0	0	0	16	8.31359	0	0	50	25.98	200	103.92	252	130.939	5	2.598	2.10388	141	73.2635	1.25223	0.650657	0	10.4892	72.05	0	0	72.05
86	2445.92	0	0	0	0	185	75.6362	50	20.4422	0	0	310	126.742	195	79.7246	100	40.8844	2.21491	230	94.0341	1.21317	0.495998	0	13.5262	10.59	0	0	10.59
87	2200.98	0	0	0	0	255	115.857	0	0	0	0	504	228.989	195	88.5969	0	0	1.636	318	144.481	1.02785	0.466997	0	15.2441	3.83	0.42	0	4.25
88	3326.46	195	58.6209	195	58.6209	382	114.837	50	15.031	0	0	280	84.1736	190	57.1178	90	27.0558	2.11976	305	91.6891	1.43752	0.432147	0	15.5436	57.88	0.11	0	57.99
89	1890.38	0	0	0	0	80	42.3195	50	26.4497	50	26.4497	425	224.823	130	68.7692	50	26.4497	1.70714	100	52.8994	0.91935	0.486331	3.16762	13.6068	49.44	0	14.97	64.41
90	3306.83	110	33.2645	110	33.2645	292	88.3021	0	0	0	0	254	76.8107	193	58.3641	7	2.11683	1.34177	174	52.6184	1.25782	0.38037	0	20.3306	86.07	2.82	0	88.89
91	2173.57	105	48.3076	105	48.3076	100	46.0073	0	0	25	11.5018	485	223.135	59	27.1443	20	9.20145	1.3857	67	30.8249	0.707605	0.32555	0	12.9685	43.63	0	0	43.63
92	1608.33	105	65.2851	105	65.2851	100	62.1763	0	0	25	15.5441	485	301.555	59	36.684	20	12.4353	1.74164	67	41.6581	1.23528	0.768048	0	15.0529	60.56	0.95	0	61.51
93	3490.81	590	169.015	590	169.015	295	84.5076	0	0	0	0	130	37.2406	20	5.72933	0	0	4.01911	160	45.8346	0.471177	0.134976	0	12.8188	41.61	1.5	0	43.11
94	1699.17	0	0	0	0	25	14.7131	0	0	50	29.4261	25	14.7131	130	76.5079	0	0	0.921169	110	64.7375	0.844389	0.496942	0	20.2917	64.42	0.22	0	64.64
95	1269.6	0	0	0	0	235	185.098	0	0	63	49.6219	6	4.7259	95	74.8267	0	0	1.76221	90	70.8885	1.31179	1.03323	0	13.0577	9.41	0.03	0	9.44
96	2160.81	0	0	0	0	500	231.395	0	0	50	23.1395	155	71.7324	127	58.7743	0	0	2.71654	125	57.8487	1.4449	0.668686	0	10.0504	29.54	0.19	0	29.73
97	1210.41	0	0	0	0	205	169.364	0	0	0	0	100	82.6166	149	123.099	0	0	2.3831	170	140.448	1.06965	0.883712	0	9.06387	6.92	0	0	6.92
98	1620.98	0	0	0	0	87	53.6712	0	0	0	0	6	3.70146	68	41.9499	0	0	1.77968	88	54.2881	0.65089	0.401541	0	10.7102	54.49	0.58	0	55.07
99	2875.61	225	78.2443	225	78.2443	340	118.236	30	10.4326	50	17.3876	395	137.362	95	33.0365	50	17.3876	1.97808	213	74.0712	1.21697	0.423203	0	10.7069	107.7	0.83	0	108.53
100	1555.79	0	0	0	0	457	293.741	0	0	0	0	440	282.815	90	57.8484	0	0	1.4129	100	64.276	2.43269	1.56363	0	15.8736	44.3	0.66	0	44.96
	2088.96																										1.8063
