# Supplementary material for: Developing the developmental origins of health and disease (DOHaD) awareness scale to assess an education module for improving dietary behavior among college students
Source: PeerJ. 2024 Dec 19;12:e18669. doi: 10.7717/peerj.18669 (PMC11663402; doi:10.7717/peerj.18669)
Supplement: Supplemental Information 3 [file peerj-12-18669-s003.xlsx]

## Sheet: Sayfa1
The scores obtained according to the sub-parameters of HEI-2015																		PMDHEI						DYAHEI
Plan	Energy (kcal)	Total Fruits	Total Fruits	Whole Fruits	Whole Fruits	Total Vegetables	Total Vegetables	Greens & Beans	Greens & Beans	Whole Grains	Whole Grains	Dairy	Dairy	Total Protein Foods	Total Protein Foods	Seafood & Plant Proteins	Seafood & Plant Proteins	Moderation	Refined Grains	Refined Grains	Sodium	Sodium	Added Sugars	Saturated Fats	sucrose	Total sucrose	Total Sugar( g)	Total Sugar	Total Sugar
1	1973.81	370	187.455	370	187.455	280	141.858	0	0	0	0	230	116.526	175	88.661	125	63.3293	4.17634	50	25.3317	2.54241	1.28807	0	10.3688	0	21.79	4.4	26.19	5.3075
2	1894.62	0	0	0	0	399	210.596	80	42.2248	50	26.3905	560	295.574	300	158.343	80	42.2248	1.46567	95	50.142	0.708844	0.374135	0	17.0868	0	2.08	0.15	2.23	0.470807
3	1420.28	220	154.899	220	154.899	282	198.552	75	52.8065	50	35.2043	320	225.308	70	49.2861	0	0	2.0694	50	35.2043	1.80285	1.26937	0	11.7845	0	10.41	1.06	11.47	3.23035
4	1452.58	220	151.455	220	151.455	282	194.137	75	51.6323	50	34.4215	320	220.298	70	48.1901	0	0	2.0694	50	34.4215	1.80285	1.24114	0	11.7845	0	10.41	1.06	11.47	3.15852
5	1991.96	0	0	0	0	490	245.989	15	7.53027	108	54.218	330	165.666	15	7.53027	15	7.53027	1.74728	128	64.2583	1.84995	0.928709	0	14.9642	0	45.32	0.7	46.02	9.24115
6	1568.36	200	127.522	0	0	460	293.3	150	95.6413	75	47.8207	280	178.53	90	57.3848	0	0	1.19767	7	4.46326	1.30224	0.830319	0	16.7219	0	88.53	0.84	89.37	22.7932
7	1695.94	225	132.67	0	0	550	324.304	0	0	75	44.2233	60	35.3786	88	51.8886	40	23.5857	4	14	8.25501	1.51161	0.891311	0	9.66897	0	29.26	4.6	33.86	7.98613
8	1952.74	780	399.439	780	399.439	460	235.566	30	15.363	125	64.0126	280	143.388	120	61.4521	30	15.363	1.79446	58	29.7019	1.10335	0.565025	0	11.8172	0	29.62	6.04	35.66	7.30461
9	1803.83	225	124.735	225	124.735	210	116.419	75	41.5782	50	27.7188	320	177.4	70	38.8063	0	0	1.62551	138	76.5039	1.71359	0.949975	0	13.4165	0	46.77	0.98	47.75	10.5886
10	1983.54	0	0	0	0	290	146.203	0	0	50	25.2075	200	100.83	60	30.2489	0	0	1.68481	193	97.3008	1.84797	0.931654	0	16.7564	0	20.22	0.33	20.55	4.14411
11	1879.84	215	114.371	215	114.371	403	214.38	30	15.9588	50	26.598	90	47.8764	151	80.326	30	15.9588	1.96962	235	125.011	1.21069	0.644038	0	11.0307	0	11.22	3.97	15.19	3.23219
12	2454.49	105	42.7787	105	42.7787	88	35.8527	0	0	0	0	280	114.077	193	78.6314	0	0	1.44818	257	104.706	0.777477	0.316757	0	13.622	0	81.49	0.25	81.74	13.3209
13	1900.36	512	269.423	512	269.423	391	205.75	25	13.1554	80	42.0973	690	363.089	150	78.9324	50	26.3108	0.976486	30	15.7865	1.04932	0.552167	0	14.904	0	88.78	3.53	92.31	19.43
14	1985.19	500	251.865	500	251.865	338	170.261	30	15.1119	125	62.9663	280	141.044	120	60.4476	30	15.1119	1.80047	58	29.2163	1.08547	0.546783	0	11.6331	0	34.98	6.02	41	8.26117
15	1805.25	145	80.3213	145	80.3213	437	242.072	30	16.6182	50	27.697	360	199.418	139	76.9976	30	16.6182	1.1055	105	58.1637	1.22686	0.679604	0	16.6813	0	32.08	1.16	33.24	7.36518
16	1858.54	225	121.063	225	121.063	380	204.462	0	0	50	26.9028	230	123.753	215	115.682	0	0	2.16191	175	94.1599	2.18695	1.1767	0	10.8569	0	6.83	0.83	7.66	1.64861
17	1685.8	242	143.552	242	143.552	467	277.02	0	0	50	29.6595	230	136.434	95	56.3531	0	0	1.59085	70	41.5233	1.50355	0.891889	0	16.6888	0	14.12	1.62	15.74	3.73473
18	1965.62	500	254.373	500	254.373	307	156.185	30	15.2624	125	63.5932	280	142.449	120	61.0494	30	15.2624	1.79688	58	29.5072	1.097	0.558092	0	11.7444	0	29.86	5.88	35.74	7.27302
19	1803.83	225	124.735	225	124.735	256	141.92	75	41.5782	50	27.7188	320	177.4	70	38.8063	0	0	1.62551	138	76.5039	1.71359	0.949975	0	13.4165	0	46.77	0.98	47.75	10.5886
20	1470.12	20	13.6043	20	13.6043	390	265.284	30	20.4065	0	0	6	4.0813	83	56.458	30	20.4065	3.44375	90	61.2195	1.86267	1.26702	0	7.8361	0	42.27	0.15	42.42	11.5419
21	1845.3	225	121.931	225	121.931	257	139.273	75	40.6438	50	27.0959	120	65.0301	70	37.9342	0	0	1.76312	85	46.063	1.47218	0.797802	0	11.6127	0	41.28	1.03	42.31	9.17141
22	1863.85	600	321.914	400	214.61	390	209.244	0	0	100	53.6524	250	134.131	150	80.4786	100	53.6524	2.21648	50	26.8262	1.65758	0.889331	0	11.0191	0	42.66	1.47	44.13	9.47072
23	1092.97	288	263.502	288	263.502	78	71.3652	0	0	0	0	273	249.778	182	166.519	40	36.5975	1.46339	48	43.917	2.27555	2.08199	0	16.4195	0	3.89	0.19	4.08	1.49318
24	1961.89	320	163.108	320	163.108	288	146.797	30	15.2914	0	0	390	198.788	80	40.777	30	15.2914	1.68678	178	90.7288	1.43518	0.731531	0	12.3906	0	39.41	1.64	41.05	8.36948
25	2007.71	350	174.328	150	74.712	451	224.634	30	14.9424	50	24.904	254	126.512	180	89.6544	60	29.8848	2.21253	120	59.7696	2.16396	1.07782	0	12.592	0	32.37	0.6	32.97	6.56868
26	1828.93	0	0	0	0	475	259.715	30	16.403	125	68.346	430	235.11	170	92.9505	80	43.7414	2.42252	5	2.73384	1.61977	0.885639	0	14.1624	0	12.5	0.04	12.54	2.74259
27	1108.01	0	0	0	0	500	451.259	30	27.0756	75	67.6889	220	198.554	180	162.453	40	36.1008	2.09667	10	9.02519	1.54738	1.39654	0	12.6876	0	3	0.25	3.25	1.17327
28	1845.42	200	108.376	200	108.376	550	298.035	30	16.2565	25	13.5471	210	113.795	120	65.0258	30	16.2565	2.65255	155	83.9917	2.03661	1.1036	0	10.5976	0	13.4	0.71	14.11	3.05838
29	2241.45	296	132.057	296	132.057	442	197.194	0	0	65	28.9991	350	156.149	190	84.7666	0	0	1.51699	140	62.4596	1.44401	0.644229	0	12.644	0	89.85	1.66	91.51	16.3305
30	2005.52	426	212.414	426	212.414	314	156.568	0	0	25	12.4656	436	217.4	175	87.2592	30	14.9587	1.81463	110	54.8486	1.10716	0.552056	0	11.7172	0	71.05	1.99	73.04	14.5678
31	1764.02	330	187.073	330	187.073	504	285.711	0	0	0	0	680	385.483	60	34.0132	0	0	1.49243	165	93.5364	1.98228	1.12373	0	15.158	0	24.21	2.18	26.39	5.98406
32	1190.32	276	231.87	276	231.87	242	203.307	0	0	50	42.0055	260	218.429	125	105.014	0	0	1.87367	45	37.805	1.20472	1.0121	0	11.3717	0	7.73	0.95	8.68	2.91686
33	1719.33	150	87.2433	150	87.2433	169	98.2941	169	98.2941	50	29.0811	400	232.649	165	95.9676	100	58.1622	2.37512	128	74.4476	1.18625	0.689951	0	11.1916	0	36.77	0.51	37.28	8.67315
34	2031.79	0	0	0	0	415	204.253	50	24.6088	0	0	275	135.349	245	120.583	145	71.3656	2.37915	155	76.2874	1.44259	0.710007	0	13.4704	0	10.87	0.1	10.97	2.15967
35	1752.75	300	171.16	300	171.16	362	206.533	30	17.116	50	28.5266	230	131.222	70	39.9372	30	17.116	2.22286	260	148.338	1.22985	0.701669	0	7.14249	0	13.8	0.44	14.24	3.24975
36	2051.27	225	109.688	225	109.688	274	133.576	75	36.5627	50	24.3751	280	136.501	100	48.7503	80	39.0002	3.29429	50	24.3751	1.37493	0.670284	0	10.7494	0	36.01	1.1	37.11	7.23649
37	1965.06	200	101.778	200	101.778	364	185.236	150	76.3335	0	0	360	183.201	130	66.1557	0	0	1.35897	125	63.6113	1.28163	0.652209	0	17.0331	0	40.74	0	40.74	8.29288
38	1995.36	200	100.233	200	100.233	364	182.423	150	75.1744	0	0	360	180.419	130	65.1512	0	0	1.35897	125	62.6453	1.28163	0.642305	0	17.0331	0	40.74	0	40.74	8.16695
39	2011.63	0	0	0	0	484	240.601	15	7.45664	108	53.6878	230	114.335	15	7.45664	15	7.45664	1.74698	128	63.63	1.83179	0.910599	0	14.8178	0	50.31	0.7	51.01	10.143
40	1608.14	0	0	0	0	295	183.442	30	18.6551	75	46.6377	200	124.367	135	83.9479	30	18.6551	1.5232	77	47.8814	2.39114	1.4869	0	17.0078	0	16.41	0.14	16.55	4.11656
41	1780.24	225	126.387	25	14.0431	292	164.023	75	42.1292	50	28.0861	290	162.899	70	39.3205	0	0	1.74603	110	61.7894	1.50154	0.843448	0	12.1029	0	45.44	0.98	46.42	10.4301
42	2018.59	265	131.28	265	131.28	260	128.803	0	0	100	49.5395	280	138.711	165	81.7402	80	39.6316	3.41263	80	39.6316	1.30741	0.647686	3.44399	11.2266	17.38	25.02	0.74	43.14	8.54854
43	1935.73	452	233.504	452	233.504	177	91.4384	0	0	50	25.83	460	237.636	98	50.6269	0	0	1.16471	154	79.5565	1.04145	0.538012	0	12.6743	0	66.9	0.11	67.01	13.847
44	1866.66	0	0	0	0	37	19.8215	0	0	25	13.3929	430	230.358	120	64.2859	50	26.7858	1.90956	65	34.8216	2.23217	1.19581	0	16.8461	0	42.18	0.23	42.41	9.08789
45	1743.47	320	183.542	320	183.542	320	183.542	320	183.542	0	0	200	114.714	300	172.071	50	28.6784	4.07178	140	80.2996	1.05545	0.605375	0	6.25649	0	23.93	0.66	24.59	5.64162
46	1969.55	235	119.317	235	119.317	640	324.947	0	0	125	63.4663	420	213.247	85	43.1571	0	0	1.18264	10	5.0773	1.8504	0.939505	0	18.164	0	47.07	0.11	47.18	9.58188
47	1762.71	0	0	0	0	480	272.308	0	0	0	0	240	136.154	140	79.4232	0	0	1.92253	65	36.875	1.80233	1.02248	0	12.1926	0	49.58	0.62	50.2	11.3916
48	1919.94	105	54.6892	105	54.6892	659	343.24	30	15.6255	25	13.0212	560	291.676	173	90.107	80	41.668	2.14462	25	13.0212	0.698485	0.363806	0	13.7114	0	56.16	0.35	56.51	11.7733
49	1631.15	105	64.3718	105	64.3718	370	226.834	0	0	50	30.6532	375	229.899	65	39.8492	0	0	1.57114	75	45.9798	2.75937	1.69167	0	16.5969	0	20.17	0.05	20.22	4.95846
50	1807.17	60	33.2011	60	33.2011	400	221.341	0	0	0	0	30	16.6005	171	94.6231	10	5.53351	2.13615	190	105.137	1.17469	0.650015	0	10.3886	0	46.03	0.43	46.46	10.2835
51	1864.38	386	207.039	386	207.039	136	72.9465	0	0	0	0	214	114.783	120	64.3646	30	16.0911	1.10953	125	67.0464	1.36601	0.732688	0	16.9681	0	51.26	2.37	53.63	11.5062
52	2025.3	325	160.47	325	160.47	547	270.083	30	14.8126	25	12.3439	280	138.251	256	126.401	30	14.8126	1.76347	63	31.1065	2.09665	1.03523	0	17.8107	0	13.1	0.16	13.26	2.61887
53	1728.24	225	130.19	225	130.19	285	164.908	75	43.3968	50	28.9312	280	162.015	70	40.5036	0	0	2.71112	50	28.9312	1.54147	0.89193	0	10.8162	0	30.71	1.1	31.81	7.3624
54	1809.44	486	268.591	486	268.591	302	166.902	302	166.902	100	55.2657	470	259.749	198	109.426	0	0	1.19561	129	71.2928	1.27013	0.701948	0	9.96772	0	35.23	1.06	36.29	8.02237
55	1914.55	436	227.73	436	227.73	455	237.654	30	15.6695	75	39.1737	285	148.86	107	55.8878	30	15.6695	1.41171	80	41.7853	1.96037	1.02393	0	16.453	0	18.45	2.31	20.76	4.33731
56	1877.21	755	402.193	115	61.2611	443	235.989	30	15.9812	50	26.6353	270	143.83	280	149.158	90	47.9435	2.37018	70	37.2894	1.24264	0.661959	0	12.4461	0	29.93	0.48	30.41	6.47983
57	1513.21	205	135.474	205	135.474	277	183.055	75	49.5635	50	33.0423	280	185.037	70	46.2593	0	0	2.1302	57	37.6683	1.73944	1.1495	0	10.8723	0	30.4	1.06	31.46	8.3161
58	1900.31	200	105.246	200	105.246	315	165.762	30	15.7869	50	26.3115	430	226.279	170	89.4591	30	15.7869	1.75086	215	113.139	1.93178	1.01656	0	11.1267	0	16.85	0	16.85	3.54679
59	1886.27	200	106.029	200	106.029	315	166.996	30	15.9044	50	26.5073	430	227.963	170	90.125	30	15.9044	1.75086	215	113.982	1.93178	1.02412	0	11.1267	0	16.85	0	16.85	3.57319
60	2133.51	0	0	0	0	487	228.262	0	0	0	0	610	285.914	130	60.9325	80	37.4969	1.6299	280	131.239	1.32126	0.619291	0	16.1396	0	55.39	0.35	55.74	10.4504
61	1712.6	225	131.379	225	131.379	277	161.742	75	43.7931	50	29.1954	120	70.0689	70	40.8735	0	0	2.13484	125	72.9884	1.79277	1.04681	0	9.74308	0	31.44	0.98	32.42	7.57211
62	1818.12	272	149.605	272	149.605	385	211.757	30	16.5006	125	68.7523	450	247.508	120	66.0022	30	16.5006	1.23095	5	2.75009	1.4557	0.80066	0	16.8256	0	28.35	1.13	29.48	6.48582
63	1951.67	500	256.191	500	256.191	450	230.572	30	15.3715	125	64.0477	80	40.9905	120	61.4858	30	15.3715	1.79282	58	29.7181	1.10462	0.565989	0	11.8191	0	29.47	5.91	35.38	7.25123
64	1814.12	240	132.296	240	132.296	260	143.32	0	0	0	0	300	165.369	90	49.6108	0	0	2.73601	80	44.0985	2.01006	1.10801	0	9.75349	0	66.53	3.17	69.7	15.3683
65	2747.02	216	78.6307	216	78.6307	114	41.4995	80	29.1225	0	0	630	229.339	185	67.3457	120	43.6837	2.19723	365	132.871	1.23501	0.449581	1.90752	10.4153	13.1	15.24	5.16	33.5	4.87801
66	1600.65	237	148.065	237	148.065	120	74.9695	0	0	100	62.4746	450	281.136	133	83.0912	0	0	1.11688	128	79.9675	2.32787	1.45433	0	14.2873	0	30.54	3.8	34.34	8.58151
67	1608.36	527	327.663	527	327.663	601	373.673	150	93.2627	125	77.7189	320	198.96	170	105.698	0	0	1.78651	7	4.35226	1.89536	1.17844	0	11.5329	0	29.28	3.06	32.34	8.04298
68	1937.42	0	0	0	0	510	263.237	0	0	30	15.4845	412	212.654	189	97.5524	40	20.646	2.68856	140	72.261	1.46078	0.753981	0	12.5889	0	9.44	0.1	9.54	1.96963
69	1890.26	0	0	0	0	320	169.289	0	0	0	0	460	243.353	193	102.102	0	0	1.20487	190	100.515	1.72521	0.912685	5.54421	15.8264	26.2	3.64	0.02	29.86	6.31871
70	2243.78	204	90.918	204	90.918	240	106.962	30	13.3703	0	0	270	120.333	195	86.9069	155	69.0799	3.34258	153	68.1885	1.27977	0.570365	0	11.568	0	20.75	1.13	21.88	3.90056
71	1756.11	260	148.055	260	148.055	190	108.194	0	0	125	71.1801	210	119.582	150	85.4161	0	0	1.81076	63	35.8747	2.16098	1.23055	0	14.0014	0	44.52	2.08	46.6	10.6144
72	1746.84	486	278.217	486	278.217	270	154.565	0	0	100	57.2462	560	320.579	183	104.761	0	0	1.10994	88	50.3767	1.11788	0.639942	0	11.2008	0	38.03	1.04	39.07	8.94644
73	1953.45	0	0	0	0	258	132.074	0	0	0	0	182	93.1685	145	74.2276	0	0	1.40117	230	117.74	1.42023	0.727035	0	15.7337	0	38.54	0.17	38.71	7.92649
74	1880.4	350	186.131	350	186.131	260	138.268	0	0	50	26.5901	160	85.0883	50	26.5901	0	0	2.10743	200	106.36	1.95329	1.03876	0	10.2473	0	51.24	1.2	52.44	11.1551
75	1851.9	346	186.835	346	186.835	424	228.954	0	0	150	80.9979	200	107.997	170	91.7976	80	43.1989	3.56737	50	26.9993	1.2155	0.656355	0	9.73919	0	15.35	1.35	16.7	3.60711
76	1972.05	276	139.956	276	139.956	208	105.474	0	0	0	0	460	233.26	25	12.6772	0	0	1.47228	130	65.9212	1.03622	0.525451	0	16.959	0	57.3	1.01	58.31	11.8273
77	1521.26	325	213.639	325	213.639	510	335.248	0	0	100	65.735	190	124.896	105	69.0217	5	3.28675	2.0642	0	0	2.01747	1.32619	0	15.8494	0	13.45	0.47	13.92	3.66012
78	2127.56	570	267.913	570	267.913	392	184.249	30	14.1007	100	47.0022	360	169.208	225	105.755	135	63.453	3.86159	5	2.35011	0.694913	0.326625	0	9.38258	0	44.35	4.16	48.51	9.12031
79	1813.38	476	262.493	476	262.493	300	165.437	0	0	130	71.6893	560	308.816	90	49.6311	0	0	1.30384	75	41.3592	1.04077	0.573939	0	13.6883	0	16.23	1.16	17.39	3.83593
80	1856.74	100	53.8578	100	53.8578	495	266.596	150	80.7868	50	26.9289	400	215.431	155	83.4796	0	0	1.68268	152	81.8639	2.21109	1.19085	0	14.3283	0	31.21	0.37	31.58	6.80332
81	2271.17	0	0	0	0	410	180.524	50	22.0151	50	22.0151	360	158.509	235	103.471	135	59.4407	3.0868	60	26.4181	1.0311	0.453994	3.06098	11.8247	17.38	40.91	0.28	58.57	10.3154
82	1895.19	0	0	0	0	232	122.415	15	7.91477	8	4.22121	370	195.231	115	60.6799	15	7.91477	1.43448	162	85.4796	1.92278	1.01456	0	17.6848	0	48.27	0.72	48.99	10.3399
83	1809.11	102	56.3813	102	56.3813	105	58.0396	80	44.2206	90	49.7482	180	99.4964	130	71.8585	80	44.2206	1.28457	5	2.76379	1.00692	0.55658	0	14.2479	0	67.91	0.58	68.49	15.1434
84	1765.72	96	54.3688	96	54.3688	320	181.229	0	0	165	93.4463	370	209.546	100	56.6341	0	0	1.45882	74	41.9092	0.662608	0.375262	0	14.9752	0	18.33	0.26	18.59	4.21131
85	1836.07	135	73.5266	135	73.5266	300	163.392	30	16.3392	125	68.0802	375	204.241	160	87.1426	70	38.1249	2.25267	0	0	1.75163	0.954012	0	14.2397	0	24.53	3.71	28.24	6.15227
86	1824.58	60	32.8843	60	32.8843	452	247.728	30	16.4421	75	41.1054	230	126.056	130	71.2493	30	16.4421	2.07307	55	30.1439	2.13278	1.16892	0	10.9357	0	41.94	1.03	42.97	9.42025
87	2098.55	150	71.4779	150	71.4779	345	164.399	0	0	200	95.3039	280	133.425	170	81.0083	0	0	1.70779	60	28.5912	1.59327	0.759223	0	15.1905	0	8.01	0.71	8.72	1.6621
88	1765.05	60	33.9934	60	33.9934	273	154.67	30	16.9967	0	0	260	147.305	120	67.9867	30	16.9967	1.55625	305	172.8	1.58209	0.896344	0	11.4218	0	52.38	0.02	52.4	11.875
89	1937.53	500	258.061	500	258.061	230	118.708	30	15.4836	125	64.5151	280	144.514	125	64.5151	30	15.4836	1.79344	0	0	1.11181	0.57383	0	11.8961	0	29.02	5.93	34.95	7.21537
90	1562.68	290	185.579	290	185.579	157	100.468	75	47.9945	50	31.9963	80	51.1941	50	31.9963	0	0	2.27326	50	31.9963	1.7055	1.09139	0	10.8333	0	30.25	0.92	31.17	7.9786
91	1399.72	0	0	0	0	250	178.607	30	21.4329	100	71.4429	60	42.8657	76	54.2966	30	21.4329	1.58189	45	32.1493	0.81362	0.581273	0	11.8567	0	52.69	0	52.69	15.0573
92	2322.11	0	0	0	0	267	114.982	0	0	5	2.15321	30	12.9193	140	60.29	40	17.2257	1.65217	55	23.6854	1.4522	0.62538	0	18.096	0	93.27	0.18	93.45	16.0974
93	1042.52	20	19.1843	20	19.1843	300	287.764	0	0	50	47.9607	30	28.7764	90	86.3293	0	0	2.39763	90	86.3293	3.3842	3.24618	0	11.6804	0	4.62	0.18	4.8	1.84169
94	1836.63	105	57.1699	105	57.1699	250	136.119	0	0	175	95.2832	220	119.785	122	66.426	7	3.81133	1.52008	36	19.6011	1.15097	0.626676	0	16.9599	0	26.85	0.04	26.89	5.85638
95	1860.4	0	0	0	0	115	61.8147	50	26.8759	75	40.3139	80	43.0015	175	94.0658	50	26.8759	1.76863	203	109.116	1.84823	0.993456	0	12.3361	0	7.3	0.02	7.32	1.57386
96	1868.7	60	32.1079	60	32.1079	191	102.21	0	0	0	0	141	75.4535	178	95.2534	40	21.4053	2.17535	125	66.8914	0.887194	0.474766	0	15.4359	0	42.89	0.4	43.29	9.26633
97	1029.64	268	260.285	268	260.285	359	348.666	0	0	50	48.5607	230	223.379	90	87.4092	0	0	1.86257	0	0	1.8441	1.79102	0	13.8019	0	16.29	2.08	18.37	7.13647
98	1899.49	276	145.302	276	145.302	400	210.583	0	0	50	26.3229	430	226.377	255	134.247	25	13.1614	1.79331	30	15.7937	1.78881	0.941733	0	15.7258	0	34.61	1.07	35.68	7.5136
99	1906.8	105	55.0661	105	55.0661	360	188.798	30	15.7332	0	0	460	241.242	120	62.9327	30	15.7332	1.36542	213	111.705	1.76214	0.924135	0	12.7486	0	45.58	0.09	45.67	9.58045
100	1069.27	0	0	0	0	385	360.059	0	0	0	0	230	215.1	90	84.1696	0	0	2.09994	115	107.55	3.52103	3.29293	0	14.0647	0	1.48	0.2	1.68	0.628466
	1823.3
																									Z0	G6	G1
