# Supplementary material for: Developing the developmental origins of health and disease (DOHaD) awareness scale to assess an education module for improving dietary behavior among college students
Source: PeerJ. 2024 Dec 19;12:e18669. doi: 10.7717/peerj.18669 (PMC11663402; doi:10.7717/peerj.18669)
Supplement: Supplemental Information 4 [file peerj-12-18669-s004.xlsx]

## Sheet: Sayfa1
					The scores obtained according to the sub-parameters of HEI-2015
Plan	Energy (kcal)	Total Fruits	Total Fruits	Whole Fruits	Whole Fruits	Total Vegetables	Total Vegetables	Greens & Beans	Greens & Beans	Whole Grains	Whole Grains	Dairy	Dairy	Total Protein Foods	Total Protein Foods	Seafood & Plant Proteins	Seafood & Plant Proteins	Moderation	Refined Grains	Refined Grains	Sodium	Sodium	Added Sugars	Saturated Fats	sucrose	Total sucrose	Total Sugar( g)	Total Sugar	Total Sugar
1	1685.45	245	145.362	245	145.362	175	103.83	0	0	75	44.4985	320	189.86	63	37.3787	0	0	0.82119	68	40.3453	1.21504	0.7209	0	22.4272	0	28.11	0.46	28.57	6.78039
2	1698.55	245	144.241	245	144.241	175	103.029	0	0	75	44.1553	320	188.396	63	37.0905	0	0	0.82119	68	40.0341	1.21504	0.71534	0	22.4272	0	28.11	0.46	28.57	6.72809
3	1708.28	200	117.077	200	117.077	505	295.619	0	0	165	96.5884	460	269.277	210	122.931	0	0	1.56542	5	2.92692	2.62757	1.53814	0	15.9055	0	3.7	0.12	3.82	0.894467
4	1698.28	200	117.766	200	117.766	505	297.36	0	0	165	97.1571	460	270.862	210	123.655	0	0	1.56542	5	2.94416	2.62757	1.54719	0	15.9055	0	3.7	0.12	3.82	0.899734
5	2050.62	60	29.2594	60	29.2594	300	146.297	50	24.3829	105	51.204	600	292.594	287	139.958	87	42.4262	2.69629	80	39.0126	1.02371	0.49922	0	9.35827	0	12.1	0.13	12.23	2.38562
6	2045.57	60	29.3317	60	29.3317	300	146.658	50	24.4431	105	51.3304	600	293.317	287	140.303	87	42.5309	2.69629	80	39.1089	1.02371	0.500452	0	9.35827	0	12.1	0.13	12.23	2.39151
7	1763.02	0	0	0	0	72	40.839	30	17.0163	0	0	482	273.395	180	102.098	30	17.0163	0.940071	165	93.5894	1.0461	0.593355	0	17.377	0	61.25	0.02	61.27	13.9011
8	1764.4	75	42.5074	75	42.5074	421	238.608	180	102.018	125	70.8456	300	170.029	285	161.528	100	56.6765	3.29716	0	0	1.28504	0.728317	0	11.8443	0	61.25	0.02	61.27	13.8903
9	1760.1	75	42.6112	75	42.6112	421	239.191	180	102.267	125	71.0187	300	170.445	285	161.923	100	56.815	3.29716	0	0	1.28504	0.730097	0	11.8443	0	10.62	0.13	10.75	2.44304
10	1377.92	130	94.3451	130	94.3451	805	584.214	0	0	128	92.8936	230	166.918	92	66.7673	2	1.45146	1.41366	0	0	1.58067	1.14714	0	12.1422	0	25.74	0.1	25.84	7.50116
11	1755.3	305	173.759	305	173.759	100	56.9703	0	0	25	14.2426	250	142.426	187	106.534	47	26.776	2.50731	96	54.6915	0.907372	0.516933	0	13.6848	0	25.92	0.83	26.75	6.09582
12	1759.1	105	59.6896	105	59.6896	382	217.157	0	0	125	71.0591	260	147.803	140	79.5862	40	22.7389	2.66645	80	45.4778	2.2433	1.27525	0	13.2272	0	25.92	0.83	26.75	6.08266
13	2050.1	105	51.217	105	51.217	382	186.332	0	0	125	60.9726	260	126.823	140	68.2894	40	19.5112	2.66645	80	39.0225	2.2433	1.09424	0	13.2272	0	17.58	0.58	18.16	3.54324
14	1902.56	180	94.6094	180	94.6094	317	166.618	0	0	117	61.4961	700	367.925	175	91.9813	0	0	1.54853	80	42.0486	2.08396	1.09535	0	15.1091	0	18.1	1.46	19.56	4.11235
15	1531.46	120	78.3566	120	78.3566	321	209.604	180	117.535	120	78.3566	400	261.189	168	109.699	30	19.5892	1.71533	25	16.3243	1.01476	0.662612	0	14.4921	0	10.76	0	10.76	2.81039
16	2070.65	40	19.3176	40	19.3176	278	134.257	55	26.5617	50	24.147	430	207.664	155	74.8557	96	46.3623	2.10408	134	64.714	1.65145	0.797549	0	14.0808	0	4.61	0.17	4.78	0.923382
17	2081.77	40	19.2144	40	19.2144	278	133.54	55	26.4198	50	24.018	430	206.555	155	74.4559	96	46.1146	2.10408	134	64.3683	1.65145	0.793289	0	14.0808	0	4.61	0.17	4.78	0.918449
18	1915.54	205	107.019	205	107.019	357	186.37	50	26.1023	50	26.1023	470	245.362	200	104.409	90	46.9841	2.95875	90	46.9841	1.45188	0.757947	0	11.342	0	11.97	0.9	12.87	2.68749
19	1904.43	205	107.644	205	107.644	357	187.458	50	26.2546	50	26.2546	470	246.793	200	105.018	90	47.2582	2.95875	90	47.2582	1.45188	0.762369	0	11.342	0	11.97	0.9	12.87	2.70317
20	909.2	0	0	0	0	235	258.469	0	0	50	54.9934	242	266.168	90	98.9881	0	0	2.03962	50	54.9934	4.04188	4.44554	0	14.4919	0	3.74	0.1	3.84	1.6894
21	1636.88	45	27.4913	45	27.4913	422	257.808	30	18.3275	58	35.4333	330	201.603	175	106.911	55	33.6005	2.58053	2	1.22184	2.41365	1.47454	0	11.9147	0	15.62	0.41	16.03	3.91721
22	1662.49	227	136.542	227	136.542	513	308.573	0	0	50	30.0754	260	156.392	225	135.339	0	0	1.70087	115	69.1733	2.07598	1.24872	0	14.9306	0	20.97	0.8	21.77	5.23793
23	1651.36	227	137.462	227	137.462	513	310.653	0	0	50	30.2781	260	157.446	225	136.251	0	0	1.70087	115	69.6396	2.07598	1.25713	0	14.9306	0	20.97	0.8	21.77	5.27323
24	1837.66	145	78.9047	145	78.9047	582	316.707	0	0	75	40.8128	650	353.711	130	70.7421	0	0	1.72671	78	42.4453	1.64558	0.895474	0	15.1432	0	6.85	0.48	7.33	1.59551
25	1979.2	300	151.576	60	30.3153	360	181.892	0	0	125	63.1568	230	116.209	255	128.84	165	83.367	2.76549	25	12.6314	1.38649	0.70053	0	12.938	0	6.85	0.48	7.33	1.48141
26	1987.4	300	150.951	60	30.1902	360	181.141	0	0	125	62.8962	230	115.729	255	128.308	165	83.023	2.76549	25	12.5792	1.38649	0.69764	0	12.938	0	18.85	0.22	19.07	3.83818
27	1887.83	325	172.155	325	172.155	320	169.507	0	0	0	0	470	248.963	100	52.9709	0	0	2.22749	133	70.4513	2.21999	1.17595	0	12.7623	0	13.18	1.21	14.39	3.049
28	1594.07	335	210.154	335	210.154	408	255.949	30	18.8198	100	62.7325	440	276.023	230	144.285	30	18.8198	1.56343	10	6.27325	2.1035	1.31958	0	15.6223	0	14.84	1.51	16.35	4.10271
29	1602.05	335	209.107	335	209.107	408	254.674	30	18.726	100	62.42	440	274.648	230	143.566	30	18.726	1.56343	10	6.242	2.1035	1.313	0	15.6223	0	10.42	0.03	10.45	2.60916
30	1857.74	149	80.205	149	80.205	336	180.865	0	0	100	53.8288	630	339.122	90	48.446	0	0	1.39466	63	33.9122	1.58841	0.855022	0	12.8769	0	10.42	0.03	10.45	2.25005
31	1855.13	287	154.706	287	154.706	505	272.218	30	16.1714	100	53.9046	360	194.056	120	64.6855	30	16.1714	2.05538	5	2.69523	1.78179	0.960466	0	12.3517	0	42.79	4.51	47.3	10.1987
32	1773.8	395	222.686	395	222.686	477	268.914	0	0	75	42.2821	285	160.672	210	118.39	0	0	1.82792	30	16.9128	1.30443	0.735385	0	14.5366	0	8.89	8.33	17.22	3.88319
33	1264.67	65	51.3968	65	51.3968	315	249.077	50	39.536	25	19.768	416	328.94	105	83.0256	50	39.536	1.85291	40	31.6288	1.04971	0.830029	0	15.1439	0	41.36	0.1	41.46	13.1133
34	1761.76	300	170.284	300	170.284	565	320.702	0	0	0	0	400	227.046	85	48.2472	0	0	2.57022	168	95.3592	0.89922	0.51041	0	8.43929	0	61.37	0.12	61.49	13.961
35	2211.22	240	108.537	240	108.537	217	98.1359	50	22.612	105	47.4851	300	135.672	439	198.533	175	79.1418	2.13604	69	31.2045	0.598426	0.270632	0	12.838	0	61.37	0.12	61.49	11.1233
36	2231.42	240	107.555	240	107.555	217	97.2475	50	22.4073	105	47.0552	300	134.444	439	196.736	175	78.4254	2.13604	69	30.922	0.598426	0.268182	0	12.838	0	5.76	0.01	5.77	1.03432
37	1295.02	240	185.325	240	185.325	302	233.201	0	0	80	61.7751	230	177.603	40	30.8876	0	0	1.63604	30	23.1657	2.24586	1.73423	0	11.6477	0	22.91	1.13	24.04	7.42537
38	1621.28	0	0	0	0	90	55.5117	0	0	50	30.8398	80	49.3437	58	35.7742	0	0	1.03771	90	55.5117	0.959896	0.592061	0	14.4275	0	75.54	0.31	75.85	18.7136
39	1863.76	225	120.724	225	120.724	521	279.542	50	26.8275	50	26.8275	12	6.4386	165	88.5307	50	26.8275	2.1732	137	73.5073	0.282831	0.151753	0	10.9569	0	20.77	0.99	21.76	4.67013
40	1504	486	323.138	486	323.138	197	130.984	30	19.9468	80	53.1915	300	199.468	160	106.383	70	46.5426	3.21942	0	0	0.155592	0.103452	0	8.42878	0	26.15	0.87	27.02	7.18617
41	1484.2	486	327.449	486	327.449	197	132.731	30	20.2129	80	53.9011	300	202.129	160	107.802	70	47.1635	3.21942	0	0	0.155592	0.104832	0	8.42878	0	26.15	0.87	27.02	7.28204
42	1614.71	95	58.8341	95	58.8341	420	260.109	0	0	100	61.9306	235	145.537	145	89.7994	0	0	2.03466	105	65.0272	1.48606	0.920328	0	13.1875	0	21.75	0.4	22.15	5.48705
43	2097.06	350	166.9	350	166.9	361	172.146	0	0	143	68.1907	740	352.875	95	45.3015	0	0	1.27664	75	35.7644	1.53191	0.730502	0	15.3429	0	3.44	0.07	3.51	0.669509
44	1280.08	325	253.89	325	253.89	174	135.929	0	0	50	39.0601	250	195.3	150	117.18	0	0	1.61948	129	100.775	2.34496	1.83189	0	8.59165	0	35.34	0.79	36.13	11.2899
45	1531.8	316	206.293	316	206.293	180	117.509	180	117.509	25	16.3207	260	169.735	64	41.7809	0	0	1.9312	129	84.2146	1.40588	0.917797	0	12.1269	0	29.21	2.98	32.19	8.4058
46	1897.19	455	239.828	455	239.828	550	289.902	0	0	100	52.7095	430	226.651	141	74.3204	80	42.1676	2.79917	42	22.138	1.38694	0.731047	0	12.6376	0	23.88	0.77	24.65	5.19716
47	1900.15	455	239.455	455	239.455	550	289.451	0	0	100	52.6274	430	226.298	141	74.2047	80	42.1019	2.79917	42	22.1035	1.38694	0.729908	0	12.6376	0	23.88	0.77	24.65	5.18906
48	2112.32	225	106.518	225	106.518	416	196.94	0	0	50	23.6707	440	208.302	189	89.4751	40	18.9365	2.41467	125	59.1766	0.821126	0.388732	0	12.9568	0	10.62	1.41	12.03	2.27806
49	1598.45	330	206.45	330	206.45	235	147.017	0	0	130	81.3288	585	365.98	165	103.225	0	0	1.59576	0	0	1.78503	1.11673	0	10.878	0	16.09	1.24	17.33	4.3367
50	1952.8	590	302.13	590	302.13	395	202.274	0	0	150	76.8128	290	148.505	110	56.3294	0	0	1.84034	82	41.991	1.6763	0.858406	0	12.499	0	23.36	0.69	24.05	4.92626
51	1394.78	290	207.918	290	207.918	500	358.479	0	0	125	89.6199	430	308.292	13	9.32047	0	0	1.23778	0	0	1.08847	0.78039	0	12.5375	0	8.74	4.85	13.59	3.89739
52	2283.2	275	120.445	275	120.445	187	81.9026	0	0	113	49.4919	500	218.991	156	68.3252	0	0	1.09066	100	43.7982	1.44669	0.633625	0	18.9996	0	11.32	0.95	12.27	2.14961
53	1537.53	558	362.92	558	362.92	174	113.169	30	19.5118	30	19.5118	300	195.118	140	91.0551	50	32.5197	2.5508	120	78.0473	0.549927	0.357669	0	6.97157	0	18.44	0.88	19.32	5.02624
54	1713.77	250	145.877	250	145.877	394	229.902	50	29.1754	25	14.5877	442	257.911	169	98.613	69	40.2621	1.47927	50	29.1754	1.29329	0.754646	0	16.3377	0	18.44	0.88	19.32	4.50936
55	1523.03	433	284.302	433	284.302	334	219.3	0	0	0	0	310	203.542	92	60.4059	0	0	1.51974	104	68.2849	0.453116	0.29751	0	12.8704	0	16.55	0.18	16.73	4.39387
56	1713.77	250	145.877	250	145.877	394	229.902	50	29.1754	25	14.5877	442	257.911	169	98.613	69	40.2621	1.47927	50	29.1754	1.29329	0.754646	0	16.3377	0	51.99	0.29	52.28	12.2023
57	1710.81	250	146.13	250	146.13	394	230.3	50	29.2259	25	14.613	442	258.357	169	98.7836	69	40.3318	1.47927	50	29.2259	1.29329	0.755951	0	16.3377	0	51.99	0.29	52.28	12.2234
58	1883.75	115	61.0484	115	61.0484	390	207.034	150	79.6284	125	66.357	580	307.896	180	95.5541	80	42.4685	1.3942	32	16.9874	2.16599	1.14983	0	17.4768	0	38.05	0.05	38.1	8.09025
59	1786.49	240	134.342	40	22.3903	550	307.866	0	0	75	41.9818	560	313.464	100	55.9757	0	0	1.52769	5	2.79878	2.41015	1.3491	0	16.1915	0	59.03	0.28	59.31	13.2797
60	1562.86	426	272.577	426	272.577	127	81.2613	0	0	0	0	437	279.616	69	44.1498	0	0	1.51638	163	104.296	0.940014	0.60147	0	13.1816	0	22.09	0.8	22.89	5.85849
61	1897.48	210	110.673	210	110.673	142	74.8361	0	0	25	13.1754	216	113.835	220	115.943	125	65.8768	2.52503	35	18.4455	0.968664	0.5105	0	11.8436	0	22.09	0.8	22.89	4.82535
62	1923.32	210	109.186	210	109.186	142	73.8307	0	0	25	12.9984	216	112.306	220	114.386	125	64.9918	2.52503	35	18.1977	0.968664	0.503641	0	11.8436	0	42.51	0.28	42.79	8.8992
63	1766	195	110.419	195	110.419	265	150.057	50	28.3126	0	0	435	246.319	231	130.804	50	28.3126	1.54054	115	65.1189	0.736648	0.417128	0	14.3307	0	22.01	0.84	22.85	5.17554
64	1435.65	210	146.275	210	146.275	430	299.516	0	0	80	55.7239	548	381.709	45	31.3447	0	0	1.07326	35	24.3792	0.803349	0.559572	0	18.2374	0	22.41	0.87	23.28	6.48626
65	1441.49	210	145.683	210	145.683	430	298.302	0	0	80	55.4981	548	380.162	45	31.2177	0	0	1.07326	35	24.2804	0.803349	0.557305	0	18.2374	0	22.41	0.87	23.28	6.45998
66	1970.37	225	114.192	225	114.192	367	186.259	0	0	50	25.3759	400	203.008	210	106.579	0	0	1.50877	200	101.504	1.4942	0.758336	0	11.7161	0	29.09	0.76	29.85	6.05978
67	1833.34	486	265.09	486	265.09	625	340.908	150	81.8179	136	74.1815	600	327.272	110	59.9998	20	10.9091	2.03426	0	0	1.69867	0.926546	0	13.3601	0	33.25	1.12	34.37	7.49888
68	1848.49	486	262.917	486	262.917	625	338.114	150	81.1473	136	73.5736	600	324.589	110	59.508	20	10.8196	2.03426	0	0	1.69867	0.918952	0	13.3601	0	33.25	1.12	34.37	7.43742
69	1967.71	315	160.085	315	160.085	510	259.185	0	0	50	25.4102	580	294.759	140	71.1487	0	0	1.50232	165	83.8538	1.28915	0.655154	0	15.7523	0	12.63	1.04	13.67	2.77886
70	1984.61	0	0	0	0	105	52.9071	0	0	25	12.5969	460	231.784	223	112.365	80	40.3102	2.75054	120	60.4653	1.36107	0.685812	0	12.5979	0	45.72	0.02	45.74	9.21894
71	1642.41	220	133.95	220	133.95	210	127.861	0	0	100	60.8861	434	264.246	157	95.5912	30	18.2658	1.35972	27	16.4393	1.12631	0.685769	0	13.9843	0	20.92	1.13	22.05	5.37016
72	1698.42	305	179.579	305	179.579	395	232.569	0	0	50	29.4391	470	276.728	175	103.037	125	73.5978	2.14376	46	27.084	1.43314	0.843807	0	15.8494	0	21.3	0.09	21.39	5.03762
73	1634.33	0	0	0	0	210	128.493	0	0	50	30.5936	200	122.374	220	134.612	80	48.9497	4.31351	100	61.1872	1.56443	0.957232	0	10.1877	0	6.76	0.08	6.84	1.67408
74	1494.49	110	73.6037	110	73.6037	420	281.032	60	40.1475	50	33.4562	330	220.811	155	103.714	5	3.34562	2.33604	0	0	2.47128	1.65359	0	12.7247	0	33.43	0.31	33.74	9.03051
75	1479.64	110	74.3424	110	74.3424	420	283.853	60	40.5504	50	33.792	330	223.027	155	104.755	5	3.3792	2.33604	0	0	2.47128	1.67019	0	12.7247	0	33.43	0.31	33.74	9.12114
76	1479.78	60	40.5466	60	40.5466	206	139.21	0	0	100	67.5776	200	135.155	7	4.73043	0	0	0.577508	36	24.3279	2.52308	1.70504	0	26.0127	0	5.05	0.69	5.74	1.55158
77	1872.1	453	241.974	453	241.974	400	213.664	50	26.708	50	26.708	430	229.689	208	111.105	50	26.708	1.28881	129	68.9066	1.75492	0.937408	0	12.9392	0	15.49	1.51	17	3.63228
78	1895.4	453	239	453	239	400	211.037	50	26.3797	50	26.3797	430	226.865	208	109.739	50	26.3797	1.28881	129	68.0595	1.75492	0.925885	0	12.9392	0	15.49	1.51	17	3.58763
79	1825.44	245	134.214	245	134.214	155	84.911	0	0	75	41.086	0	0	163	89.2935	40	21.9125	3.04945	48	26.295	2.02444	1.10901	0	10.6692	0	25.8	0.85	26.65	5.83969
80	1808.82	23	12.7155	23	12.7155	270	149.269	0	0	50	27.6423	105	58.0489	208	114.992	40	22.1139	2.31846	130	71.8701	1.05889	0.585406	0	12.8271	0	22.19	0.1	22.29	4.92918
81	1752.26	225	128.406	225	128.406	282	160.935	0	0	75	42.8019	612	349.263	110	62.7761	0	0	1.16738	0	0	1.20399	0.687106	0	13.2258	0	48.73	1.02	49.75	11.3568
82	1772.18	206	116.241	206	116.241	235	132.605	0	0	50	28.2138	30	16.9283	197	111.163	40	22.5711	2.72973	104	58.6848	1.26045	0.711244	0	12.2138	0	23.4	0.04	23.44	5.29066
83	1860.49	225	120.936	225	120.936	235	126.311	90	48.3744	33	17.7373	250	134.373	155	83.3114	55	29.5621	2.35117	77	41.3869	2.19464	1.1796	0	15.4556	0	12.12	0.84	12.96	2.78636
84	1967.13	0	0	0	0	225	114.38	60	30.5013	25	12.7089	400	203.342	250	127.089	100	50.8355	2.09823	115	58.4608	1.29375	0.657683	0	12.902	0	53.58	0.28	53.86	10.952
85	2264.3	240	105.993	40	17.6655	335	147.949	180	79.4948	105	46.3719	350	154.573	165	72.8702	30	13.2491	1.95913	103	45.4887	1.15889	0.511808	0	12.5443	0	24.39	1.97	26.36	4.65663
86	1993.58	275	137.943	275	137.943	334	167.538	0	0	0	0	440	220.708	256	128.412	0	0	1.48861	40	20.0644	1.62816	0.816702	0	20.0127	0	27.85	1.33	29.18	5.85479
87	2049.08	20	9.76048	20	9.76048	152	74.1796	0	0	0	0	600	292.814	280	136.647	0	0	1.1651	280	136.647	1.22104	0.595897	0	12.1313	0	59.81	0.14	59.95	11.7028
88	1193.73	290	242.936	290	242.936	80	67.0168	30	25.1313	55	46.0741	300	251.313	140	117.279	50	41.8855	2.56388	5	4.18855	0.183819	0.153987	0	8.55721	0	18.53	0.84	19.37	6.49058
89	1960.84	130	66.2981	130	66.2981	300	152.996	0	0	0	0	206	105.057	140	71.398	75	38.2489	2.45166	80	40.7988	1.97181	1.0056	0	11.7271	0	60.12	4.42	64.54	13.1658
90	1772.93	30	16.9211	30	16.9211	137	77.2732	0	0	75	42.3029	460	259.458	178	100.399	60	33.8423	2.43415	14	7.89653	1.09839	0.619534	0	15.0717	0	19.94	0	19.94	4.49877
91	1440.68	230	159.647	230	159.647	105	72.8823	0	0	50	34.7058	430	298.47	145	100.647	40	27.7647	2.35674	30	20.8235	0.639948	0.444198	0	14.4119	0	4.79	0.13	4.92	1.36602
92	2325.11	160	68.8139	160	68.8139	320	137.628	0	0	50	21.5044	315	135.477	240	103.221	0	0	1.44183	200	86.0174	2.38826	1.02716	0	16.4702	0	21.23	1.1	22.33	3.84154
93	1373.71	385	280.263	385	280.263	228	165.974	0	0	80	58.2365	400	291.182	110	80.0751	20	14.5591	1.8112	0	0	0.263571	0.191868	0	11.6946	0	22.24	1.11	23.35	6.79911
94	1614.37	125	77.4296	125	77.4296	275	170.345	0	0	75	46.4578	62	38.4051	150	92.9155	40	24.7775	3.09908	100	61.9437	2.45608	1.52139	0	10.9157	0	7.75	0.77	8.52	2.11104
95	1661.87	175	105.303	175	105.303	224	134.788	0	0	100	60.1732	236	142.009	175	105.303	75	45.1299	2.94456	65	39.1126	0.955189	0.574768	0	10.647	0	22.74	0.14	22.88	5.50705
96	1563.55	300	191.871	300	191.871	335	214.256	0	0	50	31.9785	275	175.882	140	89.5398	0	0	1.3619	25	15.9893	1.24467	0.796056	0	13.8377	0	17.4	3.32	20.72	5.30076
97	1596.58	300	187.902	300	187.902	335	209.823	0	0	50	31.3169	275	172.243	140	87.6874	0	0	1.3619	25	15.6585	1.24467	0.779588	0	13.8377	0	17.4	3.32	20.72	5.1911
98	2483.36	665	267.782	425	171.139	195	78.5226	0	0	105	42.2814	500	201.34	110	44.2948	40	16.1072	2.20186	5	2.0134	0.718031	0.289137	0	8.5638	0	171	8.5	179.5	28.9124
99	1107.25	65	58.704	65	58.704	115	103.861	0	0	0	0	236	213.141	113	102.055	0	0	1.70115	175	158.049	1.06662	0.963301	0	9.19305	0	14.09	0.25	14.34	5.1804
100	1705.19	280	164.205	280	164.205	260	152.476	30	17.5933	25	14.6611	350	205.256	231	135.469	35	20.5256	1.80991	45	26.39	0.719785	0.422114	0	14.9104	0	20.19	1.34	21.53	5.05046
	1754.47
