# Supplementary material for: Developing the developmental origins of health and disease (DOHaD) awareness scale to assess an education module for improving dietary behavior among college students
Source: PeerJ. 2024 Dec 19;12:e18669. doi: 10.7717/peerj.18669 (PMC11663402; doi:10.7717/peerj.18669)
Supplement: Supplemental Information 5 [file peerj-12-18669-s005.xlsx]

## Sheet: Sayfa1
Anthropometric measurement values
Plan	WEIGHT	HEIGHT	BMI	WAIST	HIPS	upper middle arm circumference	FAT%	TBW	WAIST/HEIGHT	WAIST/HIPS
1	45.8	159	18.1164	61	86	22	12.7	63.2	0.383648	0.709302
2	49.4	156	20.2991	66	96	26	22.1	56.4	0.423077	0.6875
3	42.2	157	17.1204	66	85	21	18.5	61.6	0.420382	0.776471
4	42.2	157	17.1204	66	85	21	18.5	61.6	0.420382	0.776471
5	45.4	159	17.9582	62	86	23	20.3	57.7	0.389937	0.72093
6	56.8	161	21.9127	72	97	27	23.6	55.1	0.447205	0.742268
7	52.1	159	20.6084	66	90	24	20.4	57.6	0.415094	0.733333
8	69.8	173	23.3219	77	98	27	32.5	48.8	0.445087	0.785714
9	57.1	157	23.1652	77	100	25	25.9	53.6	0.490446	0.77
10	66.8	164	24.8364	78	107	30	31.4	50.2	0.47561	0.728972
11	57.6	152	24.9307	73	99	26	26.4	56.1	0.480263	0.737374
12	61.9	170	21.4187	72	98	25	29.6	50.9	0.423529	0.734694
13	53.8	162	20.4999	70	94	27	26.4	53.3	0.432099	0.744681
14	65.2	170	22.5606	77	100	27	30.5	50.2	0.452941	0.77
15	62.9	160	24.5703	75	102	31	31.8	49.3	0.46875	0.735294
16	80.5	165	29.5684	97	113	31	38.5	44.3	0.587879	0.858407
17	68.7	155	28.5952	83	105	29	36.3	47.5	0.535484	0.790476
18	52	156	21.3675	71	90	24	30.5	51.7	0.455128	0.788889
19	50.1	160	19.5703	75	93	23	21.4	56.9	0.46875	0.806452
20	66.2	170	22.9066	76	103	29	29.9	50.6	0.447059	0.737864
21	58.4	161	22.53	79	98	27	35.2	48.3	0.490683	0.806122
22	50.7	155	21.103	70	93	24	25	54.2	0.451613	0.752688
23	49.8	162	18.9758	68	94	25	25.7	53.8	0.419753	0.723404
24	53.6	168	18.9909	67	91	24	23.7	55.2	0.39881	0.736264
25	63	168	22.3214	71	103	24	30	50.6	0.422619	0.68932
26	46.2	159	18.2746	67	87	23	17.7	59.5	0.421384	0.770115
27	64.5	164	23.9813	79	103	28	32.9	48.5	0.481707	0.76699
28	52.6	156	21.6141	74	96	26	23.2	55.5	0.474359	0.770833
29	64.7	161	24.9605	77	105	28	35.1	47	0.478261	0.733333
30	48.4	165	17.7778	64	87	23	26.4	53.3	0.387879	0.735632
31	48.2	162	18.3661	69	87	24	21.4	56.8	0.425926	0.793103
32	46	155	19.1467	66	91	22	19.6	58.3	0.425806	0.725275
33	55	162	20.9572	71	99	27	28.4	51.8	0.438272	0.717172
34	47.8	160	18.6719	66	90	24	25.1	54.2	0.4125	0.733333
35	45.8	158	18.3464	67	85	22	18.6	59	0.424051	0.788235
36	58.1	153	24.8195	69	97	28	26.9	52.8	0.45098	0.71134
37	46.9	168	16.6171	65	88	23	20.7	57.4	0.386905	0.738636
38	46.9	168	16.6171	65	88	23	20.7	57.4	0.386905	0.738636
39	60.4	164	22.4569	76	100	28	27	52.5	0.463415	0.76
40	52	168	18.424	64	92	22	16.7	60.2	0.380952	0.695652
41	63.8	166	23.1529	75	95	26	26.2	53.3	0.451807	0.789474
42	49.7	154	20.9563	75	89	22	17.6	59.5	0.487013	0.842697
43	51.9	164	19.2965	75	88	25	25.2	53.9	0.457317	0.852273
44	52.4	156	21.5319	67	97	25	23.5	55.3	0.429487	0.690722
45	57.7	152	24.974	75	95	31	32.4	48.9	0.493421	0.789474
46	49.3	154	20.7877	69	90	26	17.6	59.4	0.448052	0.766667
47	61.3	155	25.5151	88	101	27	28.1	52	0.567742	0.871287
48	81.6	164	30.3391	81	115	35	40	44.4	0.493902	0.704348
49	75	174	24.7721	86	103	29	36.1	46.1	0.494253	0.834951
50	75	174	24.7721	86	103	29	36.1	46.1	0.494253	0.834951
51	51.9	159	20.5293	69	91	25	23.4	55.4	0.433962	0.758242
52	48.3	156	19.8471	65	89	25	21.1	56.9	0.416667	0.730337
53	66.9	157	27.1411	82	104	30	31.5	49.5	0.522293	0.788462
54	51.8	162	19.7378	67	93	25	19.1	58.3	0.41358	0.72043
55	83.1	160	32.4609	85	116	34	39.7	43.6	0.53125	0.732759
56	53.1	171	18.1594	65	90	22	20.2	57.6	0.380117	0.722222
57	50.6	159	20.015	64	93	22	24.1	54.9	0.402516	0.688172
58	53.5	154	22.5586	65	90	25	28.2	53.6	0.422078	0.722222
59	61.5	162	23.4339	72	100	26	28.9	51.4	0.444444	0.72
60	40.6	152	17.5727	61	82	22	11.6	66	0.401316	0.743902
61	50.1	162	19.0901	68	91	27	20.8	57.3	0.419753	0.747253
62	47.3	166	17.165	61	92	23	18.2	59.2	0.36747	0.663043
63	58.2	175	19.0041	70	94	22	19.4	58	0.4	0.744681
64	52.6	174	17.3735	64	93	23	21.7	56.5	0.367816	0.688172
65	46.4	159	18.3537	66	89	23	16.4	60.3	0.415094	0.741573
66	53.2	172	17.9827	74	99	23	24.6	54.5	0.430233	0.747475
67	59.6	154	25.1307	76	101	29	27.5	52.4	0.493506	0.752475
68	58.2	167	20.8684	70	95	27	22.3	56	0.419162	0.736842
69	56.6	157	22.9624	70	97	28	27.4	52.5	0.44586	0.721649
70	52.6	162	20.0427	66	95	24	24.8	54.5	0.407407	0.694737
71	51.5	160	20.1172	65	94	23	22.9	55.7	0.40625	0.691489
72	53.5	167	19.1832	67	94	23	21.7	56.6	0.401198	0.712766
73	52.4	155	21.8106	72	92	28	28.1	51.9	0.464516	0.782609
74	41.2	150	18.3111	66	83	23	22	57	0.44	0.795181
75	54.5	149	24.5484	78	96	27	27.3	52.7	0.52349	0.8125
76	52.6	165	19.3205	69	91	24	22.2	56.1	0.418182	0.758242
77	45.6	158	18.2663	66	87	24	22.6	56.1	0.417722	0.758621
78	58.9	158	23.594	75	96	26	27.3	52.5	0.474684	0.78125
79	50.7	163	19.0824	68	93	24	24.7	54.6	0.417178	0.731183
80	61	154	25.721	79	100	28	38.4	46.6	0.512987	0.79
81	51.9	160	20.2734	65	91	28	24.7	54.5	0.40625	0.714286
82	65.6	159	25.9483	85	103	28	32.4	49.8	0.534591	0.825243
83	83.7	161	32.2904	98	110	30	37.8	44.9	0.608696	0.890909
84	66	160	25.7812	82	103	30	29.2	51.1	0.5125	0.796117
85	62.3	159	24.643	70	98	26	28.2	51.7	0.440252	0.714286
86	65.4	169	22.8984	82	103	28	24.8	54.3	0.485207	0.796117
87	52.4	150	23.2889	77	95	24	28.6	51.7	0.513333	0.810526
88	51.5	158	20.6297	69	93	25	25.6	53.8	0.436709	0.741935
89	52.6	167	18.8605	65	90	23	25.7	53.8	0.389222	0.722222
90	60.3	151	26.4462	74	100	30	27.2	52.6	0.490066	0.74
91	63.5	156	26.093	79	103	30	32.9	48.5	0.50641	0.76699
92	45.9	155	19.1051	65	87	24	21.6	56.9	0.419355	0.747126
93	51.4	153	21.9574	67	91	24	24.6	54.6	0.437908	0.736264
94	54.8	161	21.1412	70	96	26	20.6	57.5	0.434783	0.729167
95	53.9	159	21.3204	73	96	25	25.3	55.3	0.459119	0.760417
96	74.1	160	28.9453	83	103	31	35.3	47.5	0.51875	0.805825
97	46.1	152	19.9533	65	88	20	24.3	54.9	0.427632	0.738636
98	62.9	165	23.1038	68	102	28	26.8	52.8	0.412121	0.666667
99	60.2	168	21.3294	71	97	24	26.6	53.9	0.422619	0.731959
100	56.4	153	24.0933	80	93	26	22.3	56.2	0.522876	0.860215
	56.221	160.67	21.7898	72.04	95.39	25.73	25.826	53.863
