# Supplementary material for: Developing the developmental origins of health and disease (DOHaD) awareness scale to assess an education module for improving dietary behavior among college students
Source: PeerJ. 2024 Dec 19;12:e18669. doi: 10.7717/peerj.18669 (PMC11663402; doi:10.7717/peerj.18669)
Supplement: Supplemental Information 6 [file peerj-12-18669-s006.xlsx]

## Sheet: Sayfa1
Anthropometric measurement values
Plan	WEIGHT	HEIGHT	BMI	WAIST	HIPS	upper middle arm circumference	FAT%	TBW	WAIST/HEIGHT	WAIST/HIPS
1	46.7	159	18.4724	13.5	62.5	62	87	22	0.389937	0.712644
2	48.8	155	20.3122	23.2	55.5	70	92	24	0.451613	0.76087
3	42.9	157	17.4044	21.1	59.4	67	86	22	0.426752	0.77907
4	42.9	157	17.4044	21.1	59.4	67	86	22	0.426752	0.77907
5	47.5	159	18.7888	19.8	57.9	65	89	23	0.408805	0.730337
6	54.4	161	20.9868	25.1	54.2	75	94	26	0.465839	0.797872
7	49.9	159	19.7381	19.6	58.1	65	92	23	0.408805	0.706522
8	69.8	173	23.3219	32.5	48.7	76	99	28	0.439306	0.767677
9	56.3	157	22.8407	26.1	53.5	74	98	25	0.471338	0.755102
10	67.2	163	25.2926	31.7	50	76	105	31	0.466258	0.72381
11	58.5	152	25.3203	30.3	50.4	78	99	25	0.513158	0.787879
12	62.6	170	21.6609	28.9	51.3	71	98	26	0.417647	0.72449
13	52.4	162	19.9665	24.2	54.9	75	94	24	0.462963	0.797872
14	64.5	170	22.3183	30.4	50.2	79	101	29	0.464706	0.782178
15	62.3	160	24.3359	30.7	50.1	76	102	26	0.475	0.745098
16	80.8	165	29.6786	38.4	44.6	92	112	33	0.557576	0.821429
17	69	155	28.7201	37.5	46.7	86	106	29	0.554839	0.811321
18	53	156	21.7784	29.8	50.9	75	91	21	0.480769	0.824176
19	50.1	160	19.5703	20.4	57.7	71	92	25	0.44375	0.771739
20	66.7	170	23.0796	30.1	50.4	76	102	26	0.447059	0.745098
21	59.3	161	22.8772	35.6	48.1	74	98	29	0.459627	0.755102
22	52.7	155	21.9355	26	53.5	71	98	24	0.458065	0.72449
23	50.4	162	19.2044	22.6	56	70	94	25	0.432099	0.744681
24	53.6	168	18.9909	22.6	56	73	96	23	0.434524	0.760417
25	63	168	22.3214	29	51.3	69	102	26	0.410714	0.676471
26	46.9	159	18.5515	16.6	60.1	68	87	22	0.427673	0.781609
27	64.8	164	24.0928	33.3	48.1	78	100	26	0.47561	0.78
28	52.1	156	21.4086	21.7	56.6	68	93	24	0.435897	0.731183
29	64	161	24.6904	32.5	48.8	77	102	27	0.478261	0.754902
30	50	165	18.3655	25.6	53.8	66	91	23	0.4	0.725275
31	48.4	162	18.4423	19.4	58.3	65	87	23	0.401235	0.747126
32	46.1	155	19.1883	21.7	56.6	65	90	22	0.419355	0.722222
33	54.9	162	20.9191	28.6	51.7	73	96	25	0.450617	0.760417
34	46.6	160	18.2031	23.2	55.6	64	90	23	0.4	0.711111
35	45.4	158	18.1862	17.2	59.9	65	85	22	0.411392	0.764706
36	58.6	153	25.0331	29	51.4	68	98	29	0.444444	0.693878
37	48.8	168	17.2902	18.4	59	65	88	26	0.386905	0.738636
38	48.8	168	17.2902	18.4	59	65	88	26	0.386905	0.738636
39	61.3	164	22.7915	27.1	52.5	76	98	28	0.463415	0.77551
40	52	168	18.424	14	62.1	67	94	22	0.39881	0.712766
41	64.9	166	23.552	27.4	52.4	75	96	30	0.451807	0.78125
42	49.1	154	20.7033	20.2	57.8	72	88	23	0.467532	0.818182
43	53	164	19.7055	24.2	54.7	74	87	24	0.45122	0.850575
44	52.6	156	21.6141	22.8	55.7	68	95	25	0.435897	0.715789
45	60.4	152	26.1427	33.3	48.3	78	97	27	0.513158	0.804124
46	49.1	154	20.7033	15.9	60.7	67	90	25	0.435065	0.744444
47	61.1	155	25.4318	30.3	50.4	78	99	28	0.503226	0.787879
48	81.1	164	30.1532	38.9	45	85	115	33	0.518293	0.73913
49	76	174	25.1024	34.3	47.4	81	106	29	0.465517	0.764151
50	76	174	25.1024	34.3	47.4	81	106	29	0.465517	0.764151
51	50.9	159	20.1337	22.2	56.2	67	90	25	0.421384	0.744444
52	49.2	156	20.217	20.9	57.1	67	88	23	0.429487	0.761364
53	67.1	157	27.2222	31.9	49.2	84	103	31	0.535032	0.815534
54	52.4	162	19.9665	18.9	58.6	70	93	26	0.432099	0.752688
55	83.8	160	32.7344	39.4	43.8	86	116	32	0.5375	0.741379
56	52.9	171	18.091	19.3	58.2	70	91	22	0.409357	0.769231
57	49.6	159	19.6195	24.2	54.8	65	90	24	0.408805	0.722222
58	56.7	154	23.9079	27.3	52.6	69	100	26	0.448052	0.69
59	59.1	162	22.5194	30	50.6	71	98	25	0.438272	0.72449
60	41.2	152	17.8324	11.4	65.7	60	82	23	0.394737	0.731707
61	51.4	162	19.5854	23	55.8	67	93	23	0.41358	0.72043
62	48.4	166	17.5642	18.1	59.2	62	91	22	0.373494	0.681319
63	57.3	175	18.7102	20.6	57.2	72	94	25	0.411429	0.765957
64	53.3	174	17.6047	22.8	55.7	71	93	23	0.408046	0.763441
65	45.1	159	17.8395	13	63	64	86	23	0.402516	0.744186
66	52.9	172	17.8813	25.5	53.9	71	98	24	0.412791	0.72449
67	57.2	154	24.1187	27.1	52.7	75	101	29	0.487013	0.742574
68	58.5	167	20.976	21.9	56.4	68	97	26	0.407186	0.701031
69	54.1	157	21.9482	28.8	51.4	70	96	27	0.44586	0.729167
70	51.2	162	19.5092	23.8	55.2	65	95	24	0.401235	0.684211
71	51.6	160	20.1562	23.1	55.6	65	93	22	0.40625	0.698925
72	53.8	167	19.2908	22.3	56.1	72	93	24	0.431138	0.774194
73	51.3	155	21.3528	27.3	52.6	74	93	26	0.477419	0.795699
74	41.1	150	18.2667	20.9	57.9	67	83	24	0.446667	0.807229
75	53.3	149	24.0079	24.8	54.4	82	97	30	0.550336	0.845361
76	52.1	164	19.3709	19.2	58.3	72	88	23	0.439024	0.818182
77	45.3	158	18.1461	22.5	56.1	63	85	23	0.398734	0.741176
78	59.7	158	23.9144	30.2	50.4	74	95	30	0.468354	0.778947
79	50.2	163	18.8942	24.7	54.6	66	91	24	0.404908	0.725275
80	61.5	154	25.9319	37.2	47.2	76	99	29	0.493506	0.767677
81	52.7	160	20.5859	26.2	53.5	68	94	29	0.425	0.723404
82	65.8	159	26.0275	32.7	49.4	84	101	29	0.528302	0.831683
83	82.3	161	31.7503	37.4	45.2	96	109	31	0.596273	0.880734
84	66.3	160	25.8984	29.6	50.8	76	102	30	0.475	0.745098
85	59.3	159	23.4564	28.2	51.9	75	95	25	0.471698	0.789474
86	66.3	169	23.2135	23.2	55.4	77	102	27	0.455621	0.754902
87	51	150	22.6667	26.7	53	73	92	25	0.486667	0.793478
88	53.1	158	21.2706	27.9	52.2	75	96	24	0.474684	0.78125
89	51.1	167	18.3226	26.9	53	67	93	22	0.401198	0.72043
90	60	151	26.3146	28.7	51.5	72	102	28	0.476821	0.705882
91	63	156	25.8876	31.3	49.7	80	103	27	0.512821	0.776699
92	45	155	18.7305	19.9	58.2	64	86	23	0.412903	0.744186
93	49.7	153	21.2312	23.5	55.1	68	89	24	0.444444	0.764045
94	55.8	161	21.5269	25.4	53.9	70	95	26	0.434783	0.736842
95	53.6	159	21.2017	25.1	55.4	71	95	26	0.446541	0.747368
96	72	160	28.125	34.4	48.2	79	109	35	0.49375	0.724771
97	46.1	152	19.9533	22.5	56.1	68	89	22	0.447368	0.764045
98	62	165	22.7732	28.2	51.9	66	101	27	0.4	0.653465
99	60	168	21.2585	26.3	53.2	69	97	25	0.410714	0.71134
100	55.6	153	23.7515	21.6	56.5	72	94	26	0.470588	0.765957
	56.202	160.64	21.7867	25.665	53.892	71.97	95.35	25.67
