# Supplementary material for: Developing the developmental origins of health and disease (DOHaD) awareness scale to assess an education module for improving dietary behavior among college students
Source: PeerJ. 2024 Dec 19;12:e18669. doi: 10.7717/peerj.18669 (PMC11663402; doi:10.7717/peerj.18669)
Supplement: Supplemental Information 7 [file peerj-12-18669-s007.xlsx]

## Sheet: Sayfa1
Anthropometric measurement values
Plan	WEIGHT	HEIGHT	BMI	WAIST	HIPS	upper middle arm circumference	FAT%	TBW	WAIST/HEIGHT	WAIST/HIPS
1	44.2	159	17.4835	12.3	63.6	61	86	22	0.383648	0.709302
2	45.4	156	18.6555	23.4	55.8	66	91	26	0.423077	0.725275
3	41.8	157	16.9581	17.7	60.1	62	84	22	0.394904	0.738095
4	40.8	157	16.5524	17.7	59.1	62	84	21	0.394904	0.738095
5	45.4	159	17.9582	21.4	57.1	60	90	24	0.377358	0.666667
6	53.4	161	20.6011	23.3	55.7	70	94	25	0.434783	0.744681
7	45.9	159	18.1559	19	58.8	61	87	22	0.383648	0.701149
8	66.4	173	22.1858	32.1	48.3	76	99	26	0.439306	0.767677
9	53.4	157	21.6642	25.6	54.2	74	95	24	0.471338	0.778947
10	65.2	164	24.2415	30.1	50	75	105	29	0.457317	0.714286
11	57.2	152	24.7576	29.4	51.1	76	98	25	0.5	0.77551
12	62.1	170	21.4879	28.5	52.5	72	96	26	0.423529	0.75
13	53.1	162	20.2332	22.4	55.4	76	95	23	0.469136	0.8
14	63.7	170	22.0415	27.4	51.8	78	100	25	0.458824	0.78
15	60.9	160	23.7891	29.6	51.9	72	98	27	0.45	0.734694
16	74.4	165	27.3278	35.8	46	88	109	28	0.533333	0.807339
17	68.5	155	28.512	35.2	46.9	80	104	29	0.516129	0.769231
18	50.9	156	20.9155	24.1	55.5	70	87	23	0.448718	0.804598
19	50.1	160	19.5703	20.4	57.7	72	90	24	0.45	0.8
20	65.1	170	22.526	30.3	49.1	73	102	26	0.429412	0.715686
21	56.2	161	21.6813	29.4	50.4	71	94	26	0.440994	0.755319
22	50.9	155	21.1863	26	55.3	70	97	24	0.451613	0.721649
23	47.1	162	17.947	25.7	53.8	74	90	23	0.45679	0.822222
24	50.5	168	17.8926	20.8	57.4	67	90	23	0.39881	0.744444
25	61.2	168	21.6837	25.3	51.1	77	100	24	0.458333	0.77
26	46.2	159	18.2746	16	60.8	67	86	23	0.421384	0.77907
27	59.7	164	22.1966	27.9	50.7	76	96	27	0.463415	0.791667
28	54.7	156	22.477	25.6	53.8	68	97	25	0.435897	0.701031
29	62.5	161	24.1117	33.1	46.9	75	95	26	0.465839	0.789474
30	49.1	165	18.0349	27.3	52.5	67	90	22	0.406061	0.744444
31	48.1	162	18.328	21.4	56.7	68	88	24	0.419753	0.772727
32	45.3	155	18.8554	21.7	56.6	69	93	24	0.445161	0.741935
33	52.1	162	19.8522	25	54.2	67	95	24	0.41358	0.705263
34	45.5	160	17.7734	23.2	55.6	61	90	22	0.38125	0.677778
35	43.8	158	17.5453	15.1	61.4	68	84	23	0.43038	0.809524
36	50	153	21.3593	24	55	62	88	25	0.405229	0.704545
37	48.7	168	17.2548	18.4	59.1	65	88	26	0.386905	0.738636
38	47.6	168	16.8651	18.4	59.1	65	88	26	0.386905	0.738636
39	57.7	164	21.453	26.9	52.7	74	98	26	0.45122	0.755102
40	52	164	19.3337	14	62.1	66	93	22	0.402439	0.709677
41	61.2	166	22.2093	27.5	52.4	73	93	26	0.439759	0.784946
42	47.1	154	19.86	20.2	57.7	67	86	22	0.435065	0.77907
43	50.2	164	18.6645	20.4	57	67	85	25	0.408537	0.788235
44	51.8	156	21.2853	21.6	56.6	70	95	25	0.448718	0.736842
45	55.2	152	23.892	30.3	50.4	70	92	27	0.460526	0.76087
46	49.1	154	20.7033	18.3	59.1	67	89	25	0.435065	0.752809
47	59.5	155	24.7659	28.9	51.4	76	94	26	0.490323	0.808511
48	72.3	164	26.8813	32.4	46.5	81	112	30	0.493902	0.723214
49	67.4	174	22.2619	33.1	48.3	82	102	28	0.471264	0.803922
50	66.2	174	21.8655	33.1	48.3	82	102	28	0.471264	0.803922
51	50.9	159	20.1337	22.2	56.2	68	90	25	0.427673	0.755556
52	49.9	156	20.5046	21.4	56.7	67	86	24	0.429487	0.77907
53	60.1	157	24.3823	27.9	52.1	74	95	28	0.471338	0.778947
54	53	162	20.1951	19.4	58.1	70	95	26	0.432099	0.736842
55	78.1	160	30.5078	35.4	43.6	85	115	31	0.53125	0.73913
56	52.2	171	17.8516	17.8	59.4	64	89	23	0.374269	0.719101
57	45.3	159	17.9186	17.9	59.4	62	84	22	0.389937	0.738095
58	52.7	154	22.2213	25	54.3	65	90	25	0.422078	0.722222
59	56.3	162	21.4525	27.4	51.7	67	92	27	0.41358	0.728261
60	38.8	152	16.7936	10.3	68.6	58	79	20	0.381579	0.734177
61	49.3	162	18.7852	21.1	57	63	90	22	0.388889	0.7
62	46.3	166	16.8021	17.7	59.6	61	86	21	0.36747	0.709302
63	56.6	175	18.4816	20.1	57.6	73	93	27	0.417143	0.784946
64	52.9	174	17.4726	19.3	58.2	70	91	25	0.402299	0.769231
65	43.6	159	17.2462	13.1	62.8	60	84	22	0.377358	0.714286
66	53.7	172	18.1517	23.8	54.9	72	97	24	0.418605	0.742268
67	53.4	154	22.5164	24.2	54.9	67	95	25	0.435065	0.705263
68	58.2	167	20.8684	22.3	56	66	97	25	0.39521	0.680412
69	54.2	157	21.9887	27.6	51.9	68	97	26	0.433121	0.701031
70	53.5	162	20.3856	26.2	53.5	68	98	26	0.419753	0.693878
71	51.5	160	20.1172	22.9	55.7	65	93	21	0.40625	0.698925
72	52.5	167	18.8246	21.7	56.6	70	93	24	0.419162	0.752688
73	50.9	155	21.1863	26.3	53.2	71	90	25	0.458065	0.788889
74	43.1	150	19.1556	23.6	55.9	70	80	23	0.466667	0.875
75	53.4	149	24.053	27.1	52.8	81	96	29	0.543624	0.84375
76	54	165	19.8347	23	55.6	74	89	24	0.448485	0.831461
77	47.4	158	18.9873	21.9	56.5	66	91	23	0.417722	0.725275
78	53.7	158	21.511	25.9	53.2	71	91	27	0.449367	0.78022
79	50.2	163	18.8942	24.7	54.6	66	91	24	0.404908	0.725275
80	54.1	154	22.8116	32.4	47.6	76	97	29	0.493506	0.783505
81	53	160	20.7031	22.8	56.7	70	91	25	0.4375	0.769231
82	63.1	159	24.9595	30.5	49.1	80	101	28	0.503145	0.792079
83	67	161	25.8478	32.1	47.2	81	104	27	0.503106	0.778846
84	62.3	160	24.3359	28.1	51.9	81	98	26	0.50625	0.826531
85	59.6	159	23.575	26.9	52.1	72	95	25	0.45283	0.757895
86	59.3	169	20.7626	25.1	53.3	74	101	23	0.43787	0.732673
87	48.5	150	21.5556	25.7	53.9	66	88	24	0.44	0.75
88	47.5	158	19.0274	22.7	58.7	70	90	22	0.443038	0.777778
89	52.2	167	18.7171	22.9	55	65	92	23	0.389222	0.706522
90	59.8	151	26.2269	26.6	55.6	76	96	29	0.503311	0.791667
91	62	156	25.4767	30.9	50.9	76	101	26	0.487179	0.752475
92	42.1	155	17.5234	15.9	61	64	82	23	0.412903	0.780488
93	46.7	153	19.9496	17.2	58	65	87	24	0.424837	0.747126
94	53.1	161	20.4853	22.9	55.7	68	97	25	0.42236	0.701031
95	51.7	159	20.4501	24.6	55.9	72	93	25	0.45283	0.774194
96	66.1	160	25.8203	30.7	49.7	78	103	31	0.4875	0.757282
97	45.7	152	19.7801	19.7	59	63	89	23	0.414474	0.707865
98	57.7	165	21.1938	24.7	53.6	66	98	27	0.4	0.673469
99	55.6	168	19.6995	23.8	55.8	67	97	25	0.39881	0.690722
100	54.1	153	23.1108	21.1	57.2	73	94	25	0.477124	0.776596
	53.937	160.63	20.9135	24.212	54.72	70.21	93.35	24.93
