# Supplementary material for: Developing the developmental origins of health and disease (DOHaD) awareness scale to assess an education module for improving dietary behavior among college students
Source: PeerJ. 2024 Dec 19;12:e18669. doi: 10.7717/peerj.18669 (PMC11663402; doi:10.7717/peerj.18669)
Supplement: Supplemental Information 8 [file peerj-12-18669-s008.xlsx]

## Sheet: Sayfa1
The scores participants assigned to each item on the Developmental Origins of Health and Disease (DOHaD) Awareness Scale during the intervention phase
Plan	1	2	3	4	5	6	7	8	9	10	11	12	13	14	15	16	17	18	19	20	DOHaD SCORE
1	4	4	4	4	4	4	3	4	4	4	4	4	4	4	4	4	4	4	4	4	75
2	4	4	3	5	5	5	5	5	5	3	5	5	5	5	4	4	5	4	5	3	84
3	4	4	4	4	3	4	4	4	4	2	4	3	1	1	4	2	4	4	4	3	63
4	5	5	4	4	3	4	4	4	4	2	4	3	1	1	4	2	4	4	4	3	65
5	4	4	2	4	4	5	5	5	5	3	5	3	2	2	4	4	5	4	5	4	74
6	4	4	3	3	3	3	2	3	2	1	3	3	2	2	3	3	3	3	3	3	54
7	4	4	3	3	3	4	3	3	3	2	3	2	2	2	3	3	3	3	3	2	55
8	4	4	4	4	4	4	4	3	4	4	3	3	3	3	3	3	3	4	3	3	66
9	5	5	5	5	4	5	3	4	4	4	4	3	3	3	3	3	3	3	3	3	71
10	4	4	4	4	4	4	3	4	4	2	4	4	4	2	4	4	4	4	4	4	71
11	4	3	3	3	2	3	2	2	2	1	3	2	2	2	2	2	4	3	2	1	46
12	4	4	4	4	4	4	3	4	3	2	4	4	3	3	4	4	4	4	4	4	71
13	4	4	4	4	4	4	4	4	4	3	4	4	4	4	4	4	4	4	4	3	74
14	4	4	4	4	4	4	4	3	4	4	3	3	3	3	3	3	3	4	3	3	66
15	4	4	3	4	4	4	3	4	4	3	4	3	2	1	4	3	3	4	4	3	64
16	4	3	3	3	3	4	3	2	4	2	4	3	2	2	4	3	4	3	3	2	57
17	3	3	3	4	4	4	3	4	4	2	4	3	2	2	4	2	4	4	3	2	60
18	4	4	4	4	4	4	3	4	4	3	4	3	3	3	4	4	4	4	4	4	71
19	5	5	5	5	5	5	5	4	5	4	5	4	3	2	5	2	5	3	5	2	79
20	4	5	5	5	5	5	5	5	5	5	5	5	5	5	5	5	5	5	5	3	92
21	4	4	3	3	3	3	3	3	3	2	3	2	2	2	3	3	3	3	3	2	54
22	5	5	5	5	5	5	5	4	5	2	5	5	4	3	4	3	5	5	5	3	83
23	4	4	4	4	4	4	4	4	4	4	4	3	4	3	3	3	4	4	4	4	72
24	4	4	2	4	3	4	4	4	4	3	4	3	3	3	4	3	4	4	4	4	68
25	4	4	3	4	3	4	3	4	4	3	4	3	3	3	4	4	4	4	3	2	66
26	5	4	4	5	4	5	5	5	5	4	5	4	4	4	4	4	5	5	4	4	84
27	5	4	3	4	4	5	5	5	5	5	5	4	3	3	4	3	5	4	5	5	81
28	4	4	3	3	3	3	4	3	3	1	3	3	3	3	3	3	4	3	3	3	59
29	4	4	2	3	2	3	4	3	3	1	3	2	2	2	3	3	3	3	3	3	53
30	3	3	3	2	3	4	4	4	4	2	4	4	4	4	4	4	4	4	4	4	68
31	5	5	4	5	4	5	4	5	5	4	5	5	5	5	5	5	5	5	5	5	91
32	4	4	3	4	3	4	4	4	4	3	4	4	4	4	4	4	4	4	4	3	72
33	4	4	2	4	3	4	4	4	4	3	4	3	3	3	4	3	4	4	4	4	68
34	4	4	4	4	4	4	3	4	3	3	4	4	4	4	4	4	3	3	4	3	71
35	5	5	4	5	4	5	3	4	4	3	5	3	3	2	3	2	5	4	4	3	72
36	4	4	4	4	3	4	3	3	3	2	3	2	1	1	3	2	3	3	2	3	54
37	4	4	3	4	3	4	3	4	4	2	4	4	4	4	4	4	3	3	4	3	68
38	5	5	4	5	4	4	3	4	4	4	4	4	4	4	4	4	3	3	4	4	76
39	4	4	3	4	4	4	4	4	4	3	4	4	4	4	3	3	4	3	4	3	70
40	5	5	5	5	5	5	5	4	5	5	4	4	4	4	4	4	4	5	4	4	85
41	3	3	3	3	2	3	2	3	3	3	3	2	2	2	3	2	3	3	2	2	49
42	4	4	3	3	4	4	4	3	4	4	3	3	3	3	3	3	3	4	3	3	64
43	5	5	4	5	5	5	5	3	5	4	5	5	4	4	5	4	5	4	5	4	86
44	4	4	3	4	4	4	4	3	4	4	4	4	4	4	4	4	4	3	4	4	73
45	3	3	3	3	2	3	2	3	3	1	3	2	2	1	2	2	1	2	2	1	41
46	4	4	3	4	4	5	5	5	5	4	5	5	4	4	4	5	5	4	5	5	84
47	4	3	3	3	3	4	3	3	3	2	3	2	1	2	1	1	3	3	3	4	51
48	4	4	3	3	3	4	3	4	4	2	4	3	3	2	3	2	4	3	2	2	58
49	4	4	4	4	4	4	3	3	4	3	4	4	4	4	3	3	4	3	4	1	67
50	4	4	4	4	4	4	4	4	4	3	4	4	4	4	4	4	4	3	4	1	71
51	5	5	5	5	5	5	5	4	5	5	4	4	4	4	4	4	5	5	4	4	86
52	4	4	4	4	4	4	4	2	4	4	3	3	3	3	3	3	3	4	3	3	65
53	4	4	1	3	3	4	4	4	4	3	4	4	4	4	4	4	4	3	4	3	68
54	4	4	3	4	3	5	5	5	4	3	5	4	4	3	4	4	5	4	4	4	77
55	3	3	3	3	3	3	3	2	4	4	3	3	3	3	3	2	2	4	3	2	55
56	4	4	4	4	4	4	3	4	4	3	4	4	3	2	4	4	4	3	4	3	69
57	4	4	4	4	4	4	4	4	4	4	4	4	3	2	4	4	4	4	4	4	73
58	4	4	3	4	4	4	4	3	4	4	3	3	3	3	3	3	3	4	3	3	65
59	5	5	4	3	3	4	4	4	4	4	4	4	4	4	4	4	4	4	4	4	76
60	4	4	3	3	3	4	3	4	4	4	4	3	2	2	3	2	4	4	4	4	64
61	4	4	3	4	3	4	3	1	2	2	3	2	1	1	3	2	2	3	2	3	50
62	4	4	4	4	4	4	4	4	4	3	3	3	3	3	3	3	3	4	3	3	66
63	4	4	4	4	4	4	4	3	4	4	3	3	3	3	3	3	3	4	3	3	66
64	4	3	2	3	2	3	3	3	3	2	3	2	2	1	3	1	3	3	3	2	48
65	5	5	4	3	5	5	5	5	4	5	4	5	5	4	4	5	5	4	4	4	86
66	5	4	3	4	4	4	4	4	4	4	4	3	4	3	4	4	4	4	4	4	74
67	5	5	3	4	3	4	3	4	4	1	4	3	3	3	4	4	4	3	4	4	68
68	5	5	4	4	4	4	4	3	4	4	3	3	3	3	3	3	3	4	3	3	68
69	4	3	3	4	4	4	3	3	4	4	4	3	2	2	3	2	3	3	3	3	60
70	4	4	4	4	4	4	4	3	4	4	3	3	3	3	2	3	3	3	3	3	64
71	5	5	4	5	4	5	5	5	5	4	5	4	4	4	5	4	5	5	5	4	87
72	5	5	4	5	4	5	5	5	5	4	5	4	4	4	5	4	5	4	4	5	86
73	4	4	4	3	4	4	4	4	3	3	2	3	3	2	3	3	3	3	3	3	62
74	4	4	3	3	3	4	4	3	3	2	3	3	3	3	3	3	3	3	3	3	60
75	5	5	4	4	4	5	5	4	5	5	4	3	1	1	4	3	4	2	4	2	69
76	5	5	3	4	3	5	5	5	4	4	5	5	5	5	5	5	5	3	5	5	87
77	4	4	4	4	3	5	5	4	4	3	4	4	3	3	4	3	5	3	4	3	72
78	5	5	4	4	4	4	4	4	5	4	5	4	4	4	5	5	5	4	5	4	83
79	5	5	4	4	4	4	4	4	4	4	4	3	3	3	4	3	4	4	4	4	74
80	5	5	3	5	4	5	3	3	3	3	5	4	3	2	5	4	5	4	5	5	78
81	5	5	3	4	3	5	4	5	4	4	5	5	4	3	3	3	4	4	4	4	77
82	4	4	4	4	3	4	3	3	3	3	4	3	3	3	4	3	3	3	3	1	62
83	5	5	5	5	5	5	5	5	5	5	3	3	3	3	3	3	3	5	3	3	77
84	5	5	4	4	3	4	3	4	3	3	3	2	1	1	4	3	4	4	3	4	64
85	4	4	4	4	3	4	3	4	4	4	3	4	3	4	4	4	3	4	4	4	71
86	5	5	3	3	3	3	3	3	3	3	3	3	3	3	3	3	3	3	3	3	61
87	5	5	4	5	5	5	5	4	5	3	5	4	4	3	4	4	5	4	3	2	79
88	4	4	3	4	3	5	4	5	4	3	4	4	3	2	4	4	4	3	4	3	70
89	3	3	3	3	3	3	3	3	3	3	3	3	3	3	3	3	3	3	3	3	57
90	5	5	4	5	5	5	5	5	5	3	5	5	4	3	4	4	5	4	5	4	85
91	5	4	4	4	4	4	5	3	4	4	4	4	3	3	3	3	5	4	4	3	73
92	4	4	5	5	5	5	4	5	5	4	5	5	5	4	5	4	5	5	5	4	88
93	4	4	4	4	4	4	4	3	4	4	3	3	3	3	3	3	3	4	2	2	64
94	4	4	4	4	4	4	4	4	4	4	4	4	4	4	4	4	4	4	4	4	76
95	3	3	3	3	3	3	3	3	3	3	2	2	2	2	2	2	2	3	2	2	48
96	5	5	4	5	4	5	3	5	4	4	5	5	5	5	5	5	3	4	5	4	86
97	4	4	2	4	3	4	3	4	3	3	4	3	3	3	4	3	4	3	3	3	64
98	5	4	4	4	3	5	5	5	5	4	5	5	4	3	5	4	5	5	5	4	84
99	3	3	1	3	2	4	4	3	3	2	3	2	1	1	2	1	2	2	2	2	43
100	5	5	5	5	5	5	5	5	5	5	5	5	5	5	4	4	5	4	5	4	91
