# Supplementary material for: Developing the developmental origins of health and disease (DOHaD) awareness scale to assess an education module for improving dietary behavior among college students
Source: PeerJ. 2024 Dec 19;12:e18669. doi: 10.7717/peerj.18669 (PMC11663402; doi:10.7717/peerj.18669)
Supplement: Supplemental Information 9 [file peerj-12-18669-s009.xlsx]

## Sheet: Sayfa1
The scores participants assigned to each item on the Developmental Origins of Health and Disease (DOHaD) Awareness Scale during the intervention phase
Plan	1	2	3	4	5	6	7	8	9	10	11	12	13	14	15	16	17	18	19	20	DOHaD SCORE
1	5	5	5	5	5	5	5	4	5	5	4	4	4	4	4	4	4	5	5	5	87
2	5	5	4	5	5	5	4	5	5	4	5	5	5	5	5	5	4	5	5	4	90
3	5	5	5	5	5	5	5	5	5	5	4	4	4	4	4	4	4	5	4	4	86
4	5	5	5	5	5	5	5	5	5	5	4	3	4	4	4	4	4	5	4	4
5	5	5	5	5	5	5	5	5	5	5	5	5	5	5	5	5	5	5	5	5	95
6	5	5	4	5	4	5	4	5	4	4	5	5	5	4	5	5	5	5	5	5	90
7	5	5	5	5	5	5	4	5	5	5	5	5	5	5	4	4	5	5	5	5	92
8	5	5	5	5	5	5	5	4	5	5	4	4	4	4	4	4	4	4	4	4	84
9	5	5	5	5	5	5	4	5	5	5	5	5	5	5	5	4	5	4	5	4	91
10	5	5	5	5	5	5	5	5	5	5	3	3	3	3	3	3	3	4	3	3	76
11	4	4	3	4	3	4	2	3	3	3	4	3	3	3	3	3	3	3	2	2	59
12	5	5	5	5	5	5	4	5	4	4	5	5	4	4	4	4	4	5	5	5	88
13	5	5	5	5	5	5	5	5	5	4	4	4	4	4	4	4	4	5	4	4	85
14	5	5	5	5	5	5	5	5	5	5	4	4	5	5	4	4	5	5	5	4	90
15	5	5	5	5	5	5	5	5	5	4	4	4	4	4	4	4	4	4	4	4	84
16	5	5	5	5	5	5	5	5	5	5	5	5	5	5	5	5	5	5	5	5	95
17	5	5	5	5	5	5	5	5	5	5	5	5	5	5	5	5	5	5	5	5	95
18	4	4	3	4	3	4	4	4	4	4	4	4	4	4	4	4	4	4	4	4	74
19	5	5	5	5	5	5	5	5	5	4	5	4	4	4	5	4	5	4	5	4	88
20	5	5	5	4	5	5	4	5	5	5	5	5	5	5	5	5	5	5	5	4	92
21	5	5	5	5	5	5	5	5	4	4	4	4	4	4	4	4	4	4	5	5	86
22	5	5	5	5	5	5	5	5	5	5	5	4	4	4	4	5	5	3	5	5	89
23	5	5	5	5	5	5	5	5	5	5	5	4	5	4	4	4	5	5	5	5	91
24	5	5	4	5	5	5	4	4	5	4	5	5	5	4	4	4	4	4	4	4	84
25	5	5	4	5	4	5	4	5	5	5	5	5	5	5	5	5	5	5	5	5	92
26	5	5	4	5	5	5	5	5	5	5	5	5	5	5	5	5	5	5	5	5	94
27	5	5	4	5	4	5	5	5	5	4	5	5	4	4	5	5	5	5	5	5	90
28	5	5	5	3	5	5	5	5	5	5	5	5	5	5	5	5	5	5	5	5	93
29	5	5	5	5	5	4	4	4	4	4	4	4	4	4	4	4	4	5	4	4	82
30	4	4	4	4	4	4	4	4	4	4	4	4	4	4	4	4	5	4	4	4	77
31	5	5	4	5	4	5	5	5	5	5	5	5	5	5	5	5	5	4	5	5	92
32	5	5	5	5	5	5	5	5	5	4	5	5	5	5	5	5	5	5	5	5	94
33	5	5	5	5	5	5	5	5	5	4	5	4	4	4	4	4	4	5	4	4	86
34	5	5	4	5	5	5	4	5	5	5	5	5	5	5	5	5	5	4	5	5	92
35	5	5	4	5	4	5	5	5	5	5	5	5	5	5	5	5	5	5	5	5	93
36	5	5	5	5	5	5	4	4	4	4	4	4	4	4	5	4	5	4	4	5	85
37	5	5	4	5	4	5	5	5	5	5	5	5	5	5	5	5	5	5	5	5	93
38	5	5	4	5	4	5	5	5	5	5	5	5	5	5	5	5	5	5	5	5
39	5	5	5	5	5	5	5	5	5	4	5	4	4	4	4	4	5	4	5	4	87
40	5	5	5	5	5	5	5	5	5	5	5	5	5	5	5	5	5	5	5	5	95
41	4	4	4	4	4	4	4	4	4	5	5	5	5	5	5	5	5	5	5	5	87
42	5	5	4	4	5	5	5	5	5	5	5	5	5	5	5	5	5	4	5	5	92
43	5	5	5	5	5	5	5	4	5	5	5	5	5	5	5	5	5	5	5	5	94
44	5	5	5	5	5	5	5	4	5	5	4	4	4	4	4	4	4	4	4	4	84
45	5	5	5	5	5	5	5	5	5	5	4	4	4	4	4	4	4	5	4	4	86
46	5	5	5	5	5	5	5	5	5	5	5	5	5	5	5	5	5	5	5	5	95
47	5	5	4	5	5	5	5	5	5	5	5	5	5	5	4	4	5	5	5	5	92
48	5	5	5	5	5	5	4	5	4	4	5	4	4	3	5	4	5	5	4	5	87
49	5	5	5	5	5	5	5	5	5	5	5	5	5	5	5	5	5	5	5	5	95
50	4	4	4	4	4	5	5	5	5	4	4	4	4	4	4	4	4	5	4	4	80
51	5	5	5	5	5	5	5	5	5	5	5	5	5	5	5	5	5	5	5	5	95
52	5	5	5	5	5	5	5	4	5	5	4	4	4	4	4	4	4	5	4	4	85
53	5	5	3	5	5	4	4	4	4	4	4	4	4	4	4	4	4	4	4	4	79
54	5	5	4	4	4	5	4	5	4	4	5	5	5	5	5	5	5	4	5	4	88
55	4	4	4	4	4	4	4	4	4	4	4	4	4	4	4	4	4	4	4	4	76
56	5	5	5	5	5	5	4	5	5	4	5	5	5	3	5	4	4	4	4	4	86
57	5	5	5	5	5	5	5	5	5	5	5	5	5	4	5	4	4	5	4	4	90
58	5	5	5	5	5	5	5	5	5	5	5	5	5	5	5	5	5	5	5	5	95
59	5	5	5	4	4	5	5	5	5	5	5	5	5	5	5	5	5	5	5	5	93
60	5	4	4	5	4	5	5	5	4	3	4	4	3	3	4	3	4	4	3	3	75
61	5	5	4	3	3	4	3	3	4	4	5	4	4	4	3	4	5	5	4	4	76
62	5	5	4	5	5	5	5	5	5	5	5	5	5	5	5	5	5	5	5	5	94
63	5	5	5	5	5	5	5	5	5	5	5	4	4	4	4	4	4	5	4	4	87
64	5	4	4	4	4	5	5	5	5	4	4	4	3	2	4	4	5	5	4	3	78
65	5	5	4	4	5	5	5	5	5	5	4	5	5	5	5	5	5	4	4	4	89
66	5	5	4	5	5	5	5	5	5	5	5	4	5	4	5	5	5	5	5	5	92
67	5	5	4	5	4	5	5	5	5	5	5	5	5	5	5	5	5	4	5	5	92
68	5	5	5	5	5	5	5	4	5	5	4	4	4	4	4	4	4	5	4	4	85
69	5	5	4	5	5	5	5	5	5	5	5	5	5	5	5	5	5	4	5	5	93
70	5	5	4	5	4	5	5	5	5	5	5	5	5	5	5	5	5	5	5	5	93
71	5	5	4	5	4	5	4	5	5	5	5	5	5	5	5	5	5	5	5	5	92
72	5	5	4	5	4	5	4	5	5	5	5	5	5	5	5	5	5	5	5	5	92
73	5	5	5	5	5	5	5	5	5	4	4	4	4	4	4	4	4	4	4	4	84
74	5	5	4	5	4	5	5	5	5	5	5	5	5	5	5	5	5	5	5	5	93
75	5	5	5	5	5	5	5	5	5	5	5	4	4	4	5	4	5	4	5	5	90
76	5	5	4	5	4	5	5	5	5	5	5	5	5	5	5	5	5	4	5	5	92
77	5	5	5	5	5	5	5	4	5	4	4	4	4	4	4	4	5	4	5	4	85
78	5	5	4	5	4	5	5	5	5	5	5	5	5	5	5	5	5	4	5	5	92
79	5	5	4	5	4	5	4	5	5	5	5	4	4	4	5	4	4	4	5	5	86
80	5	5	4	4	4	5	4	4	5	4	5	5	4	3	5	4	5	5	5	4	84
81	4	5	4	5	4	5	5	5	5	5	5	5	5	5	5	4	5	5	5	5	91
82	5	5	4	5	4	5	5	5	5	5	5	5	5	5	5	5	5	5	5	5	93
83	5	5	5	5	5	5	5	5	5	5	4	4	4	4	4	4	4	5	4	4	86
84	5	5	5	5	4	5	4	5	4	5	5	4	3	3	5	3	5	5	5	5	86
85	5	5	5	5	4	5	4	5	5	5	4	5	4	5	5	5	4	5	5	5	90
86	4	4	5	5	4	5	5	5	5	5	5	5	5	5	5	5	5	5	5	5	92
87	5	5	4	5	4	5	5	4	5	5	5	4	4	4	5	5	5	5	5	5	89
88	5	4	3	5	4	5	3	5	5	5	5	5	5	5	5	5	5	5	5	5	89
89	5	5	5	4	5	5	4	4	5	5	4	4	4	4	4	4	4	5	4	4	83
90	5	5	5	5	5	5	5	5	5	4	5	5	4	4	4	4	5	4	5	5	89
91	5	5	5	5	5	5	5	4	5	5	4	4	4	4	4	4	5	5	4	4	86
92	5	5	5	5	5	5	5	5	5	5	5	5	5	4	5	4	5	5	5	5	93
93	5	5	5	5	5	5	5	4	5	5	4	4	4	4	4	4	4	5	4	4	85
94	5	5	5	5	5	5	5	4	5	5	5	5	4	4	4	4	4	4	5	5	88
95	5	5	5	5	4	4	4	4	5	5	4	4	4	4	4	4	4	4	4	4	81
96	5	5	5	5	5	5	5	5	5	5	5	5	5	5	5	5	4	5	5	5	94
97	5	5	4	5	4	5	5	5	5	5	5	5	4	4	4	4	4	4	4	4	85
98	5	5	4	5	4	5	5	5	5	4	5	5	5	4	5	5	5	5	5	5	91
99	4	4	4	4	4	4	4	3	5	3	4	3	3	2	3	2	3	3	2	2	61
100	5	5	4	5	4	5	5	5	5	5	5	5	5	5	5	5	5	4	5	4	91
