# Supplementary material for: Developing the developmental origins of health and disease (DOHaD) awareness scale to assess an education module for improving dietary behavior among college students
Source: PeerJ. 2024 Dec 19;12:e18669. doi: 10.7717/peerj.18669 (PMC11663402; doi:10.7717/peerj.18669)
Supplement: Supplemental Information 10 [file peerj-12-18669-s010.xlsx]

## Sheet: Sayfa1
The scores participants assigned to each item on the Developmental Origins of Health and Disease (DOHaD) Awareness Scale during the intervention phase
Plan	1	2	3	4	5	6	7	8	9	10	11	12	13	14	15	16	17	18	19	20	DOHaD SCORE			1	2	3
1	5	5	5	5	5	5	5	5	5	5	5	5	5	5	5	5	5	5	5	5	95
2	5	5	4	5	5	5	5	5	5	5	5	5	5	5	5	5	5	5	5	5	94
3	5	5	5	5	5	5	5	5	5	5	4	4	4	4	4	4	4	5	4	4	86
4	5	5	5	5	5	5	5	5	5	5	4	5	4	4	4	4	4	5	4	4
5	5	5	5	5	5	5	5	5	5	5	5	5	5	5	5	5	5	5	5	5	95
6	5	5	4	4	4	5	4	5	4	3	5	4	4	5	4	5	5	5	4	4	84
7	5	5	5	5	5	5	4	5	5	4	5	4	4	4	4	4	5	4	4	4	85
8	5	5	5	5	5	5	5	4	5	5	5	5	5	5	5	5	5	5	4	4	92
9	5	5	5	5	5	5	4	5	5	5	5	5	5	5	5	5	5	5	5	5	94
10	5	5	5	5	5	5	5	5	5	5	4	4	4	4	4	4	4	5	4	4	86
11	4	4	4	4	4	4	4	3	4	4	4	3	3	3	3	3	3	3	3	3	66
12	5	5	5	5	5	5	5	5	4	4	5	5	5	5	5	5	5	4	5	5	93
13	5	5	5	5	5	5	5	5	5	5	5	5	5	5	5	5	5	5	5	5	95
14	5	5	5	5	5	5	4	5	5	5	5	5	5	5	5	5	5	5	4	4	92
15	5	5	5	5	5	5	5	5	5	5	5	5	5	5	5	5	5	5	5	5	95
16	5	5	5	5	5	5	5	5	5	4	5	4	4	5	5	5	5	5	4	4	90
17	5	5	5	5	5	5	5	5	5	5	5	5	5	5	5	5	5	4	5	5	94
18	5	5	4	5	5	5	4	5	5	5	5	5	5	5	5	5	5	5	5	5	93
19	5	5	5	5	5	5	5	5	5	5	5	5	5	5	5	5	5	5	5	5	95
20	5	5	5	5	5	5	5	4	5	5	5	5	5	5	5	5	5	4	5	5	93
21	5	5	4	5	5	5	4	5	5	5	5	5	5	5	5	5	5	5	5	5	93
22	5	5	5	5	5	5	5	5	5	5	5	4	4	4	4	4	4	5	5	5	89
23	5	5	5	5	5	5	5	5	5	5	5	5	5	5	5	5	5	5	5	5	95
24	5	5	5	5	5	5	4	5	5	4	5	5	5	5	5	5	5	5	4	5	92
25	5	5	5	5	4	5	4	5	5	5	5	5	5	5	5	5	5	5	5	5	93
26	5	5	5	5	5	5	5	5	5	5	5	5	5	5	5	5	5	4	5	5	94
27	5	5	4	5	4	5	4	4	5	4	5	4	5	4	4	5	5	5	5	5	87
28	5	5	4	5	5	5	5	5	5	5	5	5	5	5	5	5	5	5	5	5	94
29	5	5	4	4	4	5	5	5	4	3	4	3	3	4	4	5	5	5	5	3	81
30	5	5	5	5	5	5	5	5	5	5	5	5	5	5	5	5	5	5	5	5	95
31	5	5	4	4	4	5	4	5	5	4	5	5	5	5	5	4	5	5	5	4	88
32	5	5	5	5	5	5	5	4	5	5	5	5	5	5	5	5	5	4	5	5	93
33	5	5	5	5	5	5	5	5	5	5	5	5	5	5	5	5	5	5	5	5	95
34	5	5	5	5	5	5	4	5	5	5	5	5	5	5	5	5	5	4	5	5	93
35	5	4	3	5	4	5	5	5	5	5	5	5	5	5	5	4	5	4	4	4	87
36	5	5	5	5	4	5	4	4	4	3	4	4	4	4	4	4	5	4	5	3	81
37	5	4	3	5	5	5	4	5	5	5	5	5	4	4	4	4	4	5	3	3	82
38	5	5	5	5	5	5	5	5	5	5	5	5	5	5	5	5	5	5	5	5
39	5	5	4	5	5	5	5	4	5	4	5	5	4	5	5	5	5	4	4	4	88
40	5	5	5	5	5	5	5	5	5	5	5	5	5	5	5	5	5	5	5	5	95
41	5	5	5	5	5	5	4	5	5	5	5	5	5	5	5	5	5	5	5	5	94
42	5	5	5	5	5	5	5	5	5	5	5	5	5	5	5	5	5	4	5	5	94
43	5	5	5	5	5	5	5	4	5	5	5	5	5	5	5	5	5	5	5	5	94
44	5	5	5	5	5	5	5	4	5	5	4	4	4	4	4	4	4	5	4	4	85
45	5	5	5	5	5	5	4	5	5	5	5	5	5	5	5	5	5	4	5	5	93
46	5	5	5	5	5	5	5	5	5	5	5	5	5	5	5	5	5	4	4	4	92
47	5	5	5	4	4	5	5	5	4	3	4	4	4	4	4	4	5	5	4	4	83
48	5	5	5	5	5	5	5	5	5	5	5	4	4	4	4	4	4	5	4	4	87
49	5	5	5	5	5	5	5	5	5	5	5	5	5	5	5	5	5	5	5	5	95
50	5	5	5	5	5	5	5	5	5	5	5	5	5	5	5	5	5	5	5	5	95
51	5	5	5	5	5	5	5	5	5	5	5	5	5	5	5	5	5	5	5	5	95
52	5	5	5	5	5	5	5	4	5	5	4	4	4	4	4	4	4	5	4	4	85
53	5	5	5	5	5	5	4	5	5	4	5	5	5	5	5	5	5	5	5	5	93
54	5	5	5	5	5	5	5	5	5	5	5	5	5	5	5	5	5	4	4	4	92
55	5	5	5	5	5	5	5	5	5	5	5	5	5	5	5	5	5	5	5	5	95
56	5	5	5	5	5	5	4	5	5	4	5	5	5	5	5	5	4	5	5	5	92
57	5	5	5	5	5	5	5	5	5	5	5	5	5	5	5	5	5	5	5	5	95
58	5	5	5	5	5	5	5	5	5	5	5	5	5	5	5	5	5	5	5	5	95
59	5	5	5	5	5	5	5	5	5	5	4	4	4	4	4	4	4	5	4	4	86
60	5	5	4	4	4	5	5	5	4	4	4	4	4	4	4	5	5	5	4	3	83
61	5	5	5	5	5	5	5	4	5	5	5	5	5	4	4	4	4	5	5	5	90
62	5	4	4	5	5	5	5	4	5	4	5	3	3	4	3	5	4	5	3	4	80
63	5	5	5	5	5	5	5	5	5	5	5	5	5	5	5	5	5	5	5	5	95
64	5	5	3	4	4	5	5	5	5	4	5	5	4	5	4	5	5	5	4	3	85
65	4	4	3	4	4	5	5	5	5	5	5	5	5	5	5	5	4	5	5	5	88
66	5	5	4	4	4	4	5	5	5	5	5	4	4	4	4	4	4	5	5	5	85
67	5	5	3	4	3	5	4	5	5	3	5	5	5	5	5	5	5	5	5	5	87
68	5	5	4	4	4	5	4	5	5	3	5	4	3	5	4	3	5	4	3	3	78
69	5	5	4	5	5	5	5	5	5	5	5	5	5	5	5	5	5	5	5	5	94
70	5	5	5	5	5	5	5	5	5	5	5	5	5	5	5	5	5	5	5	5	95
71	5	5	5	5	5	5	4	5	5	5	5	5	5	5	5	5	5	5	5	5	94
72	5	5	4	5	5	5	5	5	5	5	5	5	5	5	5	5	5	5	5	5	94
73	5	5	5	5	5	5	5	4	5	5	4	4	4	4	4	4	4	5	5	4	86
74	5	5	4	5	4	5	5	5	5	4	5	5	5	5	5	5	5	5	5	4	91
75	5	5	5	5	5	5	5	5	5	5	5	4	4	4	5	5	5	5	4	4	90
76	5	5	5	5	5	5	5	5	5	5	5	5	5	5	5	5	5	4	4	4	92
77	5	5	5	5	5	5	5	4	5	5	5	5	4	4	4	4	4	4	5	5	88
78	5	5	5	5	5	5	5	5	5	5	5	5	5	5	5	5	5	4	5	5	94
79	5	5	4	5	4	5	5	5	5	4	5	5	5	5	5	5	5	5	5	5	92
80	5	5	4	4	4	5	4	5	5	4	5	5	4	5	5	5	5	5	4	4	87
81	5	5	5	5	5	5	5	5	5	5	4	4	4	4	4	4	4	5	4	4	86
82	5	5	5	4	4	5	4	5	5	4	5	4	4	4	5	5	4	4	5	4	85
83	5	5	5	5	5	5	5	5	5	5	4	4	5	5	5	5	5	5	5	5	93
84	4	4	4	4	4	5	5	5	5	5	5	5	5	5	5	5	5	5	5	3	88
85	5	5	5	5	5	5	5	5	5	5	4	4	4	4	5	5	5	5	5	5	91
86	5	5	5	5	5	5	5	5	5	5	5	5	5	5	5	5	5	5	5	5	95
87	5	5	4	5	4	5	5	4	5	4	5	5	5	4	4	5	5	5	3	4	86
88	4	4	3	5	5	5	3	5	5	5	5	5	5	5	5	5	5	5	5	5	89
89	5	5	4	5	4	5	5	5	5	5	5	5	5	5	5	5	5	5	5	5	93
90	5	5	5	5	5	5	5	5	5	5	5	5	5	5	4	4	5	5	5	5	93
91	5	5	5	5	5	5	4	5	4	4	4	4	4	4	4	4	5	4	4	4	84
92	5	5	4	5	5	5	4	5	5	5	5	5	5	5	5	5	4	5	5	5	92
93	5	5	5	5	5	5	5	5	5	5	5	5	5	5	5	5	5	5	5	5	95
94	5	5	5	5	5	5	5	5	5	5	5	5	5	5	5	5	5	5	5	5	95
95	5	5	5	4	4	5	4	5	5	4	5	4	4	4	5	5	4	4	5	4	85
96	5	5	5	5	5	5	4	5	5	5	5	5	5	5	5	4	5	5	5	5	93
97	5	5	3	5	3	5	4	5	5	5	5	5	5	4	4	4	4	4	4	4	83
98	5	5	5	5	5	5	5	5	5	5	5	5	5	5	5	5	5	5	5	5	95
99	5	4	4	4	3	4	4	4	4	3	4	3	3	3	3	3	4	4	4	3	69
100	5	5	5	5	5	5	5	5	5	5	5	5	5	5	5	5	5	4	5	5	94
